Novelty-seeking, information-seeking and addiction

## 1 **Novelty-seeking impairment in addiction**

2

3 **Irene Cogliati Dezza<sup>1,2,\*</sup>, Xavier Noel<sup>3</sup>, Axel Cleeremans<sup>1</sup>, Angela J. Yu<sup>4</sup>**

4 <sup>1</sup>Centre for Research in Cognition & Neurosciences, ULB Neuroscience Institute, Université Libre de  
5 Bruxelles, Belgium

6 <sup>2</sup>Department of Experimental Psychology, Faculty of Brain Sciences, University College London,  
7 London, UK

8 <sup>3</sup>Faculty of Medicine, Université Libre de Bruxelles, Belgium

9 <sup>4</sup> Department of Cognitive Science, University of California San Diego, United States

10

11

### 12 **KEY WORDS**

13 Novelty-seeking, Information-seeking, Exploration, Problem Gambling, Addiction, Reinforcement  
14 learning

15

16 **Supplemental Information:** Yes

17

18

Novelty-seeking, information-seeking and addiction

19 **ABSTRACT**

20 Information-seeking is an important aspect of human cognition. Despite its adaptive role, we have rather  
21 limited understanding on the mechanisms that subtend information-seeking in healthy individuals and in  
22 psychopathological populations. Here, we aim to formalize the computational basis of healthy human  
23 information behavior, as well as how those components may be compromised in behavioral addiction. We  
24 focus on gambling disorder, a form of addiction without the confound of substance consumption. We  
25 investigate and model human behavior using a novel decision-making task and a novel reinforcement  
26 learning model. Our results indicate that healthy information behavior is motivated by both novelty and  
27 general knowledge (or information). In contrast, problem gamblers have a specific deficit in novelty  
28 processing in choice behavior, but not in general information. This finding sheds light both on the  
29 computational mechanisms underlying healthy human information behavior, and on how they can go awry  
30 in behavioral addiction.

31

Novelty-seeking, information-seeking and addiction

## 32 INTRODUCTION

33 Humans spend considerable time in seeking information. Information-seeking is therefore an  
34 essential aspect of human cognition that supports healthy decision-making and goal-directed processing <sup>1 2 3</sup>.  
35 Here, we argue that human information behaviors can be driven by both the desire for novelty and the level  
36 of general knowledge or information: how much the decision maker wants to know about novel information  
37 available in the environment and how many pieces (or bits) of information she has already acquired in the  
38 past. This distinction can be relevant in understanding psychopathologies such addiction where individuals  
39 are trapped into the same behavioral routines (e.g., gambling, substance intake, binge eating) despite the  
40 negative consequences associated with them (e.g., financial loss, health problems <sup>4</sup>). Engaging in these  
41 repeated behaviors may be due to an inability to either represent and implement novel behavioral patterns  
42 (novelty) or to higher weights given to already known ones (general information). Here, we aim to formalize  
43 the computational basis of healthy human information behavior and how it may be compromised in gambling  
44 disorder, a form of addiction without the confound of substance consumption.

45 Information-seeking behaviors are often contraposed to the human tendency of maximizing  
46 immediate benefits. A decision-maker who is trying to find out the best restaurant in town may try out all  
47 different available options in order to obtain information on the potential benefit of each restaurant, but this  
48 information search may be costly or result in unpleasant experiences. Yet, information-seeking has a  
49 significant role in human daily activities (e.g., exploring, reading, searching, asking questions etc..). A  
50 number of studies <sup>5</sup>, including our own <sup>6 7</sup>, have suggested that healthy humans finely balance the urge for  
51 immediate reward vs. longer-term information gain during sequential decision-making (i.e., exploration-  
52 exploitation trade-off). Appropriately balancing this tension is a necessary tool for navigating in a world  
53 fraught with uncertainty and changeable dynamics. Resolving this tension plays a key role, for instance, in  
54 foraging problems <sup>8</sup>, complex decisions in the human daily life <sup>9</sup>, and even boosting the performance of  
55 artificial agents <sup>10 11</sup>. And, deficiency in its resolution has been observed in psychopathological conditions  
56 such as addiction <sup>12</sup> and depression <sup>13</sup>. Previous work, however, has not specifically considered the  
57 importance of *novelty* seeking and general *information* seeking in driving human information behavior under  
58 repeated scenarios. And, whether/how alterations in these components can independently contribute to  
59 certain pathological conditions such addiction. Investigating novelty seeking and general information seeking  
60 in addiction could help in elucidating the mechanisms underlying decision-making impairments often  
61 observed in this population <sup>14 15</sup> and ultimately developing more efficient clinical interventions (e.g.,  
62 behavioral therapies, neural stimulations or pharmacological interventions may specifically target the  
63 implementation of novel behavioral routines or devaluation of preexisting ones).

64 To study information behavior under repeated scenarios, we adopt a modified version of a popular  
65 task (i.e., the multi-armed bandit) often used to study sequential learning and decision-making behavior. In

## Novelty-seeking, information-seeking and addiction

66 the bandit task, the decision-maker must make repeated choices among options characterized by initially  
67 unknown reward distributions. Each choice can be driven either by a more myopic desire to maximize  
68 immediate gain (based on knowledge gained from previous choices and outcomes) or by a more long-term  
69 goal of being more informed about all the options. In these repeated scenarios, however, the more the  
70 decision-maker tends to choose the most rewarding options, the more those rewarding options tend to be  
71 (anti-) correlated with the amount of (remaining) information that can be obtained <sup>16 5</sup>. Accordingly, these  
72 classical decision-making tasks make it difficult to quantify exactly how much reward and information each  
73 contribute independently to choices <sup>5</sup>. Here, we therefore adopt a novel variant of the bandit task <sup>6</sup>, inspired  
74 by <sup>5</sup>, which has an initial phase of forced choices that carefully controls for reward and information associated  
75 with each option. Thus, it dissociates the relative contribution of reward and information as motivating factors  
76 in choice behavior.

77 To investigate the role that novelty-seeking and general information-seeking play in human  
78 information behavior, we introduce a new learning and decision-making model for the bandit task that makes  
79 it possible to quantitatively separate out the importance of novelty versus general information in driving  
80 human information behavior.

81 To explore the role that novelty and general information-seeking play in addictive disorders, we  
82 compare a pathological gambling group to a healthy control group. The focus on problem gambling, as  
83 opposed to substance abuse, allows us to target the behaviors underlying addiction without the confounding  
84 effects of chronic substance use and abuse <sup>17</sup>. The inclusion of the problem gambling group not only allows  
85 us to identify the processes and mechanisms that are altered in behavioral addiction, but also to reveal  
86 modular processes that operate semi-autonomously in the healthy brain and thus can independently break  
87 down in pathological conditions. Indeed, as our study will demonstrate, problem gamblers have a specific  
88 deficit in novelty processing in choice behavior, but not in general information seeking or in reward seeking.  
89

Novelty-seeking, information-seeking and addiction

## 90 **METHODS AND MATERIAL**

### 91 **Participants**

92 Forty (40) unmedicated problem gamblers (PG's; mean age = 30.1, mean 4 female) and twenty-two (22)  
 93 healthy controls (mean age = 29, 4 female) were recruited from the local communities. The sample size of  
 94 both groups was based on previous studies<sup>18 6</sup>. We excluded participants having co-morbidity with  
 95 substance abuse and alcohol use disorder or undergoing psychological and pharmacological treatment and  
 96 with injuries involving the brain (Table 1; Supplement). Gamblers were selected among those who were  
 97 gambling at least once per week, while healthy controls were those without gambling experience in the year  
 98 preceding experimental participation (Table 1; Supplement). The two groups statistically differed only in  
 99 terms of gambling severity and years of education (years of education did not correlate with any of the  
 100 behavioral measures considered in this study and removing problem gamblers with lower years of education  
 101 did not change the main results reported in the text).

102

|                           | <b>Problem Gamblers</b><br>n=40 | <b>Healthy Control</b><br>n=22 | <b>Test Statistic</b> |
|---------------------------|---------------------------------|--------------------------------|-----------------------|
| Gender (M/F)              | 36 4                            | 18 4                           | $p = 0.601$           |
| Age                       | 30.1(9.3)                       | 29(6.6)                        | $p = 0.982$           |
| Years of Education        | 14.7(2)                         | 16.2(2.2)                      | $p = 0.037^*$         |
| IQ (WAIS block)           | 8.4(2.6)                        | 9.3(1.9)                       | $p = 0.131$           |
| Gambling Severity (CPGI)  | 8.8(6.1)                        | 0                              | $p < 10^{-10}^*$      |
| Alcohol use (AUDIT)       | 4.6(3.9)                        | 5.3(3.1)                       | $p = 0.48$            |
| Drug use (DAST)           | 0.225(0.423)                    | 0.227(0.429)                   | $p = 0.992$           |
| Smoking dependence (FTND) | n=4                             | n=1                            | NA                    |
| Memory Capacity (WAIS)    | 10.3(3.5)                       | 9.7(4.1)                       | $p = 0.483$           |
| Attentional Control (ACS) | 35.4(9)                         | 37.5(7)                        | $p = 0.312$           |
| Depression (BDI)          | 5.6(4.9)                        | 4.2(4.8)                       | $p = 0.137$           |
| Anxiety (STAI-S)          | 35.1(10.9)                      | 37.9(9.5)                      | $p = 0.173$           |
| Anxiety (STAI-T)          | 39.6(12.4)                      | 43.1(11)                       | $p = 0.2$             |

## Novelty-seeking, information-seeking and addiction

|                       |           |           |             |
|-----------------------|-----------|-----------|-------------|
| Positive Mood (PANAS) | 35.4(6.3) | 36.3(5.3) | $p = 0.701$ |
| Negative Mood (PANAS) | 21.1(7.9) | 19.8(4.8) | $p = 0.808$ |

103

104

105

106

107

108

109

110

111

### 112 Behavioral Task

113

114

115

116

117

118

119

120

121

122

123

124

125

126

127

128

129

130

131

132

133

**Table 1. Demographic information.** Mean and standard deviations are shown for each measure. For each comparison, we ran a two-sampled t test, except for gender comparison where chi-squared test was used. The two groups differ only in terms of gambling severity (with no gambling problems reported in the control group) and years of education as often reported in the literature <sup>18</sup>. Note: WAIS IV-Wechsler Adult Intelligence Scale (the block-design component of the WAIS is the subset that best predicts performance IQ <sup>19</sup>); CPGI- Canadian Problem Gambling Index ; AUDIT - Alcohol Use Disorders Identification Test; DAST - Drug Abuse Screening Test; FTND - Fagerström Test for Nicotine Dependence; ACS - Attentional Control Scale; BDI- Beck Depression Inventory; STAI-S - State version of the State-Trait Anxiety Inventory; STAI-T - Trait version of the State-Trait

Participants performed 162 games of a decision-making task <sup>6</sup> which allow to orthogonalize the influence of reward and information on sequential choices <sup>5</sup> (Fig. 1a, Supplement). On each game, participants were initially instructed about which option (deck of cards) to choose from on each trial (*forced-choice task*; Fig. 1b) for six consecutive trials, after which they were free to choose from any of the options (*free-choice task*; Fig. 1c) so as to maximize their final gain. When selected, each deck provides a reward (from 1 to 100 points) generated from a truncated Gaussian distribution with mean set to either 30 (Low Reward Context) or 50 points (High Reward Context; Supplement). The generative mean for each option was stable within a game, and varied across games. The “true”, generative mean reward value of the three decks had statistically similar values in 50% of the games.

In order to perform the decision task, participants should alternate exploration vs. exploitation choices. During exploration, participants can either choose at random (undirected exploration) or they can direct their exploration toward the most informative or novel alternative (information-driven exploration) <sup>5</sup>. In order to dissociate between these two behavioral patterns, we implemented two conditions in the forced-choice task <sup>5</sup>. Participants were either forced to choose each deck 2 times (*equal information condition*), or to choose one deck 4 times, another 2 times, and the third 0 times (*unequal information condition*). Information-driven exploration was then defined as choosing options that had never been sampled during the forced-choice task (in the unequal information condition), while undirected exploration was defined as choosing options associated with the lowest gain (in the equal information condition; Supplement) <sup>6</sup>. In 50% of the games, participants played the unequal information condition. The order of card selection was randomized in both information conditions, as was the occurrence of the equal and unequal information conditions.

## Novelty-seeking, information-seeking and addiction

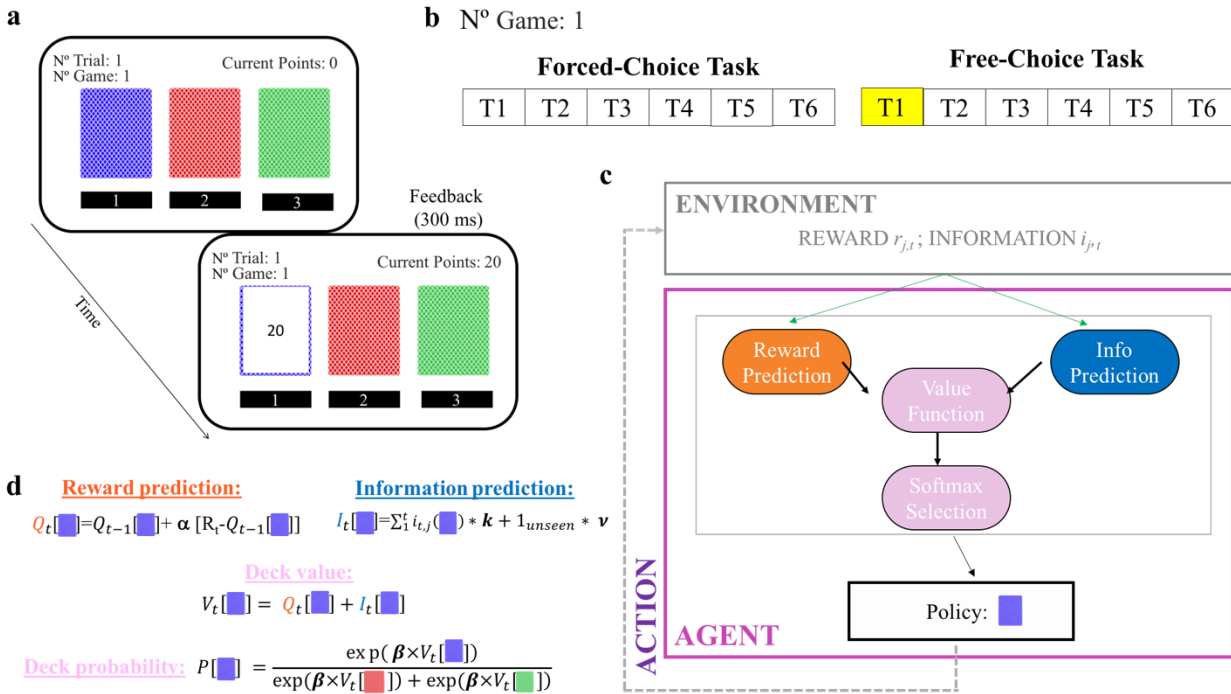

134

135

136 **Figure 1. Behavioral paradigm and RL model.** **a)** On each trial participants make choices between 3 decks of cards. After selecting

137 a deck, the card turned and revealed the points associated with the selected option, between 1 and 100 points. Participants were

138 instructed to attempt to maximize the total points earned at the end of the experiment. **b)** On each game, participants faced two

139 phases: the forced-choice task (6 consecutive trials) and the free-choice task (between 1 and 6 trials; participants were not aware

140 of the task length). In the forced-choice task, participants were forced to choose a preselected deck. In the free-choice task,

141 participants made their own choices among the same three decks of cards displayed during the forced-choice task. At this stage,

142 the points displayed on the screen were added to the participants' total score after each choice. In the first free-choice trial (in

143 yellow), reward and information are orthogonalized, so enabling the distinction between undirected and information-driven

144 exploration<sup>5</sup>. **c)** The reinforcement learning (RL) model uses reward and information in the environment to learn expected reward

145 values (reward prediction) and information prediction on a trial-basis. Next, it combines these predictions into a value function in

146 order to determine choices stochastically using a softmax function. **d)** On each trial, novelty-knowledge RL (nkRL) model updates

147 its reward prediction using the delta learning rule. Using this rule, novel reward predictions are made by integrating new outcomes

148 (i.e., the points obtained after a trial) to previous reward predictions. The degree by which this integration is achieved is controlled

149 by the learning rate  $\alpha$ . With small  $\alpha$  the model slowly updates its estimate in response to new outcomes, whereas with higher values

150 the model integrates new reward outcomes more rapidly. Next, it computes information prediction as sum of general information

151 and novelty term. The general information term describes the level of general information participants have about the selected

152 option. In other words, it defines how many information bits have been acquired by the decision-maker. The novelty term, on the

153 contrary, captures the desire for novelty. In other words, it defines how much the decision-maker wants to know about a novel

154 option. Reward and information predictions are then combined in the deck value; and a choice is made by entering the deck values

155 into the softmax function. Under lower  $\beta$ , choices are more random, thus the decision maker's choices are driven by decision noise.

156 Model's parameters are shown in bold.

157

Novelty-seeking, information-seeking and addiction

## 158 **Computational modelling**

159 During the execution of the decision-making task, humans generate both reward and information  
160 predictions which jointly guide choices <sup>6</sup>. This can be formalized using a computational model which  
161 follows a reinforcement-learning (RL) routine (Fig. 1c). In particular, the RL model learns expected reward  
162 values and information on a trial-basis, and combines them into a value function in order to determine  
163 choices stochastically <sup>6</sup> (Supplement). In order to investigate the nature of information valuation in healthy  
164 participants and problem gamblers, we implement a novel computational model which combine reward and  
165 information evaluation as previous formulations <sup>6</sup>, but also dissociates between novelty and general  
166 information during information valuation. Our model, the “novelty-knowledge RL” (nkRL) computes  
167 expected reward values using the delta learning rule <sup>20</sup> (Fig. 1d). In addition, as in previous RL versions,  
168 the predicted value of a deck is a combination of reward and information prediction (Eq. S3). However, the  
169 information term is split into two components resulting in the following value function:

$$170 \quad V_{t,j}(c) = Q_{t+1,j}(c) + \sum_1^t i_{t,j}(c) * k + 1_{unseen} * v \quad (1)$$

171 where  $Q_{t,j}(c)$  is the expected reward value for trial  $t$  and game  $j$ .  $\sum_1^t i_{t,j}(c)$  is the number of information  
172 bits acquired until trial  $t$  ( $i_{t,j}$  is either 1, if the option has been selected in a trial, or 0 otherwise).  $k$  is the  
173 knowledge (or general information) parameter which defines the weight toward previous acquired  
174 information.  $1_{unseen} * v$  captures the desire for novelty, where  $v$  is the novelty bonus given uniquely to  
175 options never selected in the past trial history. Lastly, a choice is made by entering deck values into the  
176 softmax function <sup>21</sup> (Eq. S4), where the decision policy is controlled by the inverse temperature  $\beta$  (Fig. 1d).  
177 NKRL can shed light on the processes that underpin information valuation in both healthy participants and  
178 problem gamblers by distinguishing the effects of reward-seeking and information valuation on choices ( $\beta$   
179 vs.  $k, v$ ), and of novelty-seeking and general information-seeking ( $v$  vs.  $k$ ). The model’s parameters were  
180 estimated by fitting nkRL to trial-by-trial participants’ free choices (Supplement).

181

## 182 **RESULTS**

### 183 **Information behavior in healthy individuals and problems gamblers**

184 We first investigated information-seeking behavior in both groups by looking at the first free-choice trials  
185 (namely, the one trial where we can be sure that information and experienced reward are uncorrelated <sup>5</sup>;  
186 Supplement). We focused on those games where information-driven exploration can be quantified i.e.,  
187 unequal information condition. We classified choices as *information-driven* when participants selected  
188 options that had never been sampled during the forced-choice task, as *reward-driven* when participants  
189 chose the experienced decks with the highest average of points (regardless of the number of times that deck  
190 had been selected during the forced-choice task) and *other* when the classification did not meet the previous



## Novelty-seeking, information-seeking and addiction

191 criteria (e.g., choosing a familiar deck with a relatively low average reward value). In particular, we  
192 calculated the number of trials in which information-driven, reward-driven and other strategy was adopted  
193 by each subject and we averaged those estimates across trials. This gave the averaged probability of each  
194 strategy adopted by each subject during the task. A 2 (Group: PGs, Controls) X 2 (Strategy: Reward-driven,  
195 Information-driven, Other) between-subject ANOVA revealed an effect of strategy  $F(2,180) = 65.47$ ,  $p <$   
196  $10^{-15}$  and a strategy X group interaction  $F(2,180) = 8.92$ ,  $p < 10^{-3}$ , whereas the effect of group was not  
197 significant ( $p > 0.05$ ). A post-hoc comparison revealed a decrease in information-driven exploration in  
198 problem gamblers compared to controls ( $M_{PG}=0.377$ ,  $SD_{PG} = 0.19$ ;  $M_{CON}=0.524$ ,  $SD_{CON} = 0.258$ ;  $p = 0.025$ )  
199 and an increase in reward-driven choices in the gambling group compared to healthy group ( $M_{PG}=0.476$ ,  
200  $SD_{PG} = 0.151$ ;  $M_{CON}=0.364$ ,  $SD_{CON} = 0.187$ ;  $p = 0.021$ ; Figure 2a). *Other* choices did not differ between  
201 the two groups ( $p = 0.08$ ). The decrease in information-driven exploration was independent of the reward  
202 context (Supplement; Figure S1) and on the reward condition participants were in (Supplement). Moreover,  
203 the impairment in exploration was absent when the exploratory strategies were not motivated by an  
204 informative drive (i.e., undirected exploration; Figure 2b, Supplement). Further, the increase in reward-  
205 driven choices only arise when information was delivered unequally across options (Figure 2b;  
206 Supplement).

207 Next, we extended the analysis to all free-choice trials by investigating participants' preferences  
208 toward most-, mid-, and least-sampled options. Here, we considered both equal and unequal information  
209 conditions altogether. In particular, we computed the relative frequency of choosing options whose outcome  
210 was experienced the most (Most-Sampled), the least (Least-Sampled) and intermediate (Mid-Sampled)  
211 number of times during previous trial history. A 2 (Group: PGs, Controls) X 3 (Choice: Most-Sampled, Least-  
212 Sampled, Mid-Sampled) between-subject ANOVA revealed an effect of Choice  $F(2,180) = 338.6$ ,  $p < 10^{-15}$   
213 and a Choice X Group interaction  $F(2,180) = 8.45$ ,  $p < 10^{-3}$ , whereas the effect of Group was not significant  
214 ( $p > 0.05$ ). A post-hoc comparison revealed an increase in Most-Sampled choices in problem gamblers  
215 compared to controls ( $M_{PG}=0.569$ ,  $SD_{PG} = 0.115$ ;  $M_{CON}=0.507$ ,  $SD_{CON} = 0.068$ ;  $p = 0.008$ ) and a decrease  
216 in Least-Sampled choices ( $M_{PG}=0.273$ ,  $SD_{PG} = 0.092$ ;  $M_{CON}=0.332$ ,  $SD_{CON} = 0.065$ ;  $p = 0.006$ ; Figure 2c),  
217 while Mid-Sampled choices did not differ between the two groups ( $p > 0.05$ ). Overall, problem gamblers  
218 showed increased preferences toward frequently selected options in the previous trial history, regardless of  
219 the associated outcome, at the expense of novel alternatives, compared to healthy controls. However, both  
220 groups exhibited a higher overall preference toward frequently selected options compared to options they  
221 were more ignorant about ( $p < 10^{-4}$ ; Figure 2c, S2; Supplement). Interestingly, this tendency underwent a  
222 reversal in the control group, which preferred novel options over familiar options during the first free-choice  
223 trials ( $M_{least} = 0.536$ ,  $SD_{least} = 0.258$ ;  $M_{most} = 0.262$ ,  $SD_{most} = 0.157$ ;  $p < 10^{-3}$ ; Figure 2e). This result suggests

## Novelty-seeking, information-seeking and addiction

224 that healthy controls are driven by novelty under certain conditions. This “novelty-familiarity” shift,  
 225 however, was absent in problem gamblers where novel ( $M= 0.386$ ,  $SD = 0.193$ ) and frequently selected  
 226 options ( $M= 0.344$ ,  $SD= 0.131$ ) were chosen at the same rate during the first free-choice trial ( $p > 0.05$ ;  
 227 Figure 2f).

228

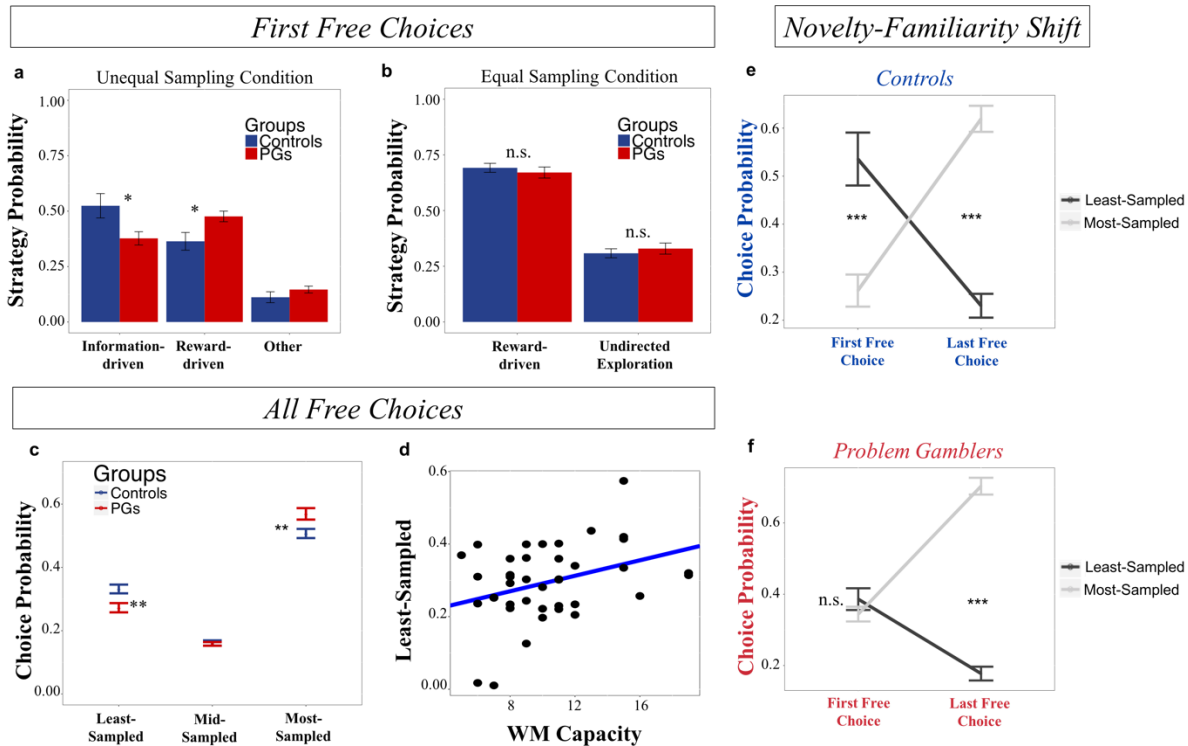

229

230

231

232

233

234

235

236

237

238

239

240

241

242

243

244

245

246

**Figure 2. Model-Free analysis.** a) Probability to choose *information-driven*, *reward-driven* and *other* strategies in the first free-choice trial of the unequal information condition (i.e., when options are sampled unequally during the forced-choice task). Probabilities were averaged across games. Information-driven exploration decreases and reward-driven strategy increases in problem gamblers (PGs) compared to healthy controls. b) Probability of choosing *reward-driven* and *undirected exploration* in the first free-choice trial of the equal information condition (i.e., when options are sampled equally during the forced-choice task). No differences were observed between the two groups. c) Probability of selecting options the outcome of which was experienced the most (Most-Sampled), the least (Least-Sampled) and the mid (Mid-Sampled) number of times during previous trial history. Probabilities were averaged across games. Problem gamblers frequently selected Most-Sampled options at the expense of Least-Sampled alternatives compared to controls. Both groups showed higher preference for familiar options (Most-Sampled). d) In problem gamblers, the probability of selecting Least-Sampled options positive correlated with working memory (WM) capacity (computed using the working memory subset of the Wechsler Adult Intelligence Scale -WAIS IV;  $r = 0.347$ ,  $p = 0.028$ ,  $n = 40$ ). As reported in Table 1, working memory capacity did not differ between problem gamblers and healthy controls as a group. e) Controls showed a novelty-familiarity shift by showing an increased preference toward novel options (Least-Sampled) in the first free-choice trial and an increased preference for familiar alternatives (Most-Sampled) in the last free-choice trial. d) Problem gamblers showed no preference between novel and familiar alternatives in the first free-choice trial, while in the last free-choice trial higher preferences toward familiar options were exhibited. In all the figures, error bars are represented as standard error of the mean (s.e.m).

Novelty-seeking, information-seeking and addiction

## 247 **Novelty-seeking in healthy individuals and novelty failure in problem gamblers**

248 In order to elucidate the mechanisms underlying information valuation in healthy controls and  
249 problem gamblers, we turn to model-based analyses.

250 We first checked whether reward and information combination during learning could better explain  
251 participants' behavior compared to only computing reward predictions (Supplement). We replicated our  
252 previous findings<sup>6</sup> by showing that combining reward and information prediction better accounts for learning  
253 processes in both groups. Next, we compared the ability of our model – nkRL- to explain participants'  
254 behavior compared to a previous RL model of the same task (i.e., gkRL; Supplement). Despite the two models  
255 are equally good in explaining participants' choices across all trials ( $BIC_{gkRL}: M_{PGs} = 876.7, SD_{PGs} = 246;$   
256  $M_{CON} = 880.9, SD_{CON} = 157.9; BIC_{nkRL}: M_{PGs} = 894.6, SD_{PGs} = 231.4; M_{CON} = 879.9, SD_{CON} = 163; p_{PGs} =$   
257  $0.86$  and controls  $p_{CON} = 0.88$ ; Figure 3a, b; Supplement), only nkRL was able to reproduce the behavioral  
258 pattern observed in problem gamblers' data in the first free choice trial (Figure 3c, d). We then adopted nkRL  
259 to better investigate the process underlying the absence of “novelty-familiarity” shift in gamblers. To do so,  
260 we compared the parameter estimates between the two groups. A Wilcoxon Signed Rank Test showed smaller  
261 novelty parameter  $v$  in problem gamblers ( $M = -1.6, SD = 15.9$ ) compared to controls ( $M = 5.15, SD =$   
262  $28.2$ ),  $p = 0.012$ , while the knowledge parameter  $k$  did not differ between gamblers ( $M = -0.304, SD = 2.34$ )  
263 and controls ( $M = 0.482, SD = 2.59$ ),  $p > 0.05$  (Figure 4 a, b). These results suggest that the absence of  
264 novelty-familiarity shift in gamblers' behavior is due to a failure in either computing or utilizing a novelty  
265 bonus early on in the free-choice period, while weights given to already acquired information were  
266 represented in the same way as in healthy controls. Problem gamblers also showed a smaller learning rate  $\alpha$   
267 ( $M = 0.349, SD = 0.253$ ) compared to controls ( $M = 0.51, SD = 0.237; p = 0.022$ ), suggesting a slower  
268 integration of new available reward outcomes from the environment (Figure 4c). Moreover, the analysis  
269 showed no differences in the parameter  $\beta$  between the two groups ( $M_{PG} = 0.484, SD_{PG} = 0.977; M_{CON} = 0.183,$   
270  $SD_{CON} = 0.188; p > 0.2$ ) suggesting that the behavioral alterations observed in problem gamblers were not  
271 related to alterations in the decision noise (or policy). This latter result additionally confirms that exploratory  
272 impairments in problem gamblers were specifically driven by novelty-related information valuation without  
273 affecting other undirected or unexplained exploratory components (e.g., softmax parameter). Overall, the  
274 model-based analyses appear to suggest that healthy subjects integrate both general information and novelty  
275 during information valuation, while in gamblers the integration of novelty is specifically impaired alongside  
276 the coding scheme of reward learning experiences.

Novelty-seeking, information-seeking and addiction

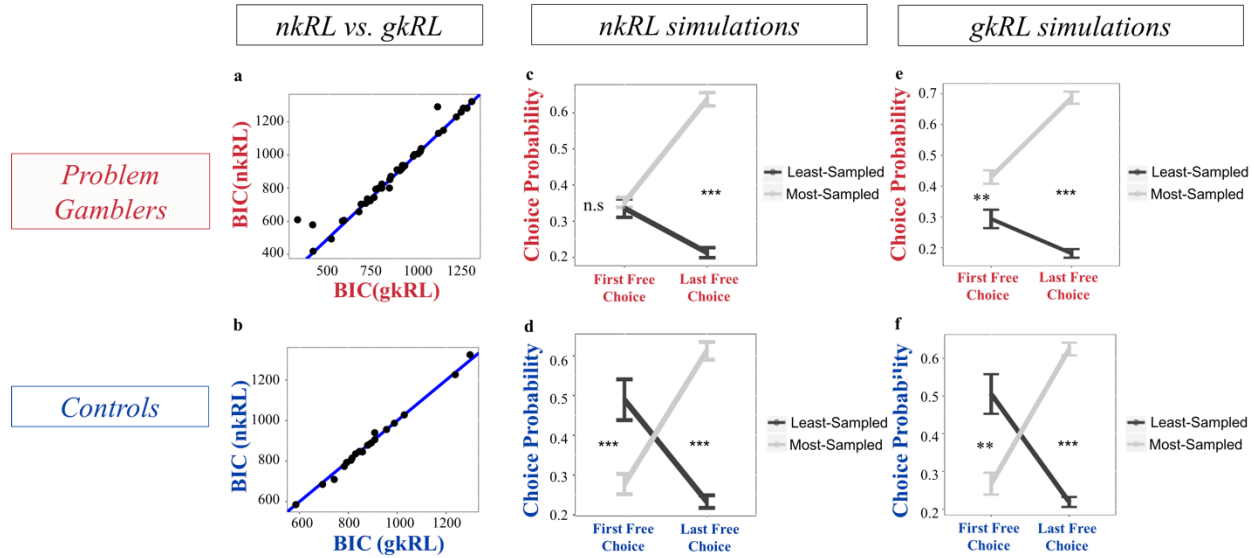

277  
 278 **Figure 3. nkRL vs. gkRL.** Comparative fit of nkRL and gkRL model in problem gamblers (a) and controls (b). The comparative  
 279 fit is based on BIC of both models computed by fitting the models to all participants' free choices. Each point is one participant.  
 280 Almost all participants line on the identity line suggesting that overall the two models equally explain participants' behavior.  
 281 Simulations of the nkRL model using the estimated individual parameters for problem gamblers (c) and controls (d). The model  
 282 correctly predicts the novelty-familiarity shift in the healthy sample, and the absence of preference toward novel and familiar  
 283 options for the gambling groups. Simulations of the gkRL model using the estimated individual parameters for problem gamblers  
 284 (e) and controls (f). The model predicts higher preferences for familiar options in the first free-choice trials for the gambling group,  
 285 while it correctly predicts the novelty-familiarity shift in the healthy sample. Error bars are represented as s.e.m.  
 286

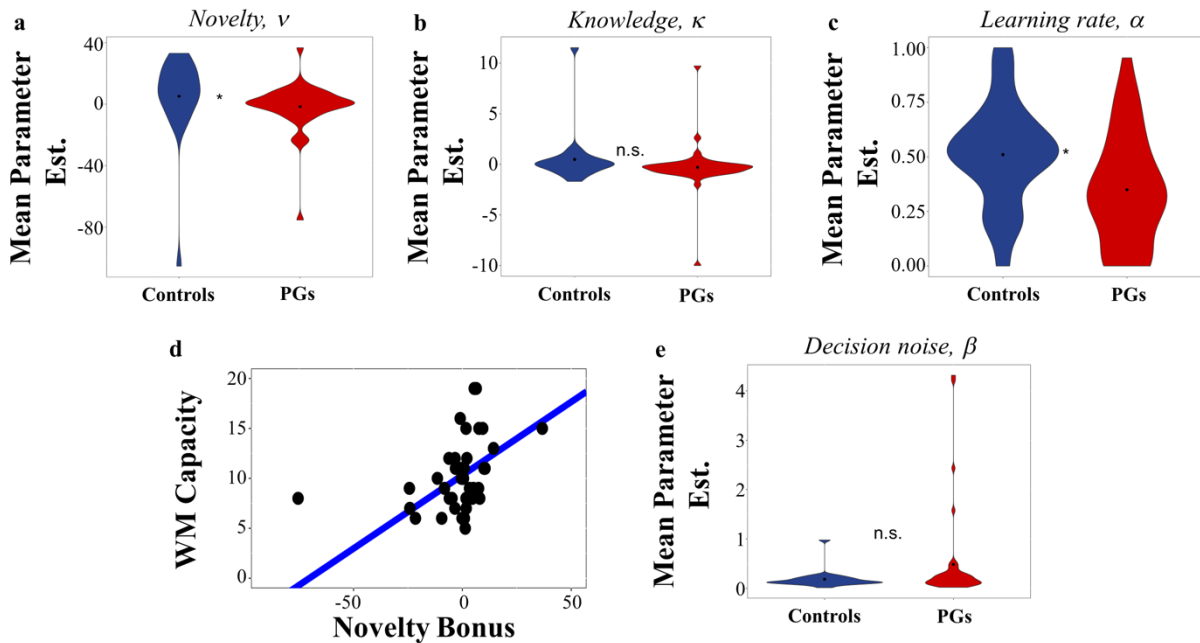

287  
 288 **Figure 4. nkRL's estimated parameters.** Model fit on all free-choices revealed a decrease in the novelty parameter  $v$  (a) in problem  
 289 gamblers (PGs) compared to controls, while the knowledge parameter  $\kappa$  did not differ between the two groups (b). Learning rate

## Novelty-seeking, information-seeking and addiction

- 290  $\alpha$  is reduced in problem gamblers compared to controls (c), while the decision noise did not differ between the two groups (e). **d)**
- 291 In problem gamblers, the novelty bonus increased as a function of working memory (WM) capacity ( $r = 0.371, p = 0.018, n = 40$ ).
- 292

Novelty-seeking, information-seeking and addiction

## 293 **DISCUSSION**

294 In this study, we adopted behavioral, self-reported, and computational measures to individuate the processes  
295 underlying human information behavior in healthy individuals and problem gamblers. We observed  
296 alternations in problem gamblers' information behavior compared to the healthy control group, as a  
297 consequence of a failure to represent novelty but not general information. By showing functional  
298 dissociations between novelty-induced exploration and general information, this study not only sheds light  
299 on the novelty-seeking impairment in addiction, but also highlights the importance of both novelty and  
300 general information-seeking in human information behavior, and their likely functional and biological  
301 dissociation in the human brain.

302 Information-seeking is a crucial component of adaptive behavior observed both in healthy humans<sup>1</sup>  
303 and animals<sup>22</sup>. Integrating information during learning appears to be a (inhibitory) control signal, that  
304 'neurotypical' subjects use to adapt to the surrounding environment<sup>7</sup>. Defective information-seeking can  
305 indeed evolve in or contribute to certain psychopathologies<sup>23 24-26 27</sup>. By showing information-based  
306 exploratory impairments in problem gamblers, our findings suggest that the search for information in problem  
307 gamblers is compromised under certain conditions. Reduced exploratory behaviors in addiction has already  
308 been documented in past research<sup>12</sup>. By focusing on problem gambling, the results of this study clarify that  
309 exploratory impairments in addiction<sup>12</sup> are the results of modifications in decision-making processes related  
310 to addictive behaviors *per se*, and not by long-term intake of chemical compounds – although our study does  
311 not rule out the possibility that neurophysiological alterations in the brain could pre-date or even induce  
312 problem gambling. Furthermore, by using a task and a model that can specifically identify different  
313 components of exploratory drive, we showed that this impairment is specific to the information component  
314 of exploratory behaviors, and in particular to the elimination of the novelty bonus. The reduced ability to  
315 represent novelty may explain perseveration and impaired flexibility observed in both gambling<sup>28,29</sup> and  
316 substance abuse disorder<sup>30,31</sup>. In other words, our results suggest that the reduced ability to represent novel  
317 behavioral patterns may freeze addicted individuals' decision processes and trap them into the same  
318 behavioral routines. Further work, however, is necessary to confirm this suggestion and to test whether  
319 novelty-seeking may be target during clinical intervention to reduce the impact of perseveration in addicted  
320 individuals.

321 In contrast, we found that there was no difference between healthy controls and problem gamblers  
322 in terms of the softmax decision policy's temperature parameter fitted to the two subject groups. This  
323 temperature parameter has sometimes been interpreted as representing "undirected exploration" or decision  
324 "noise" in the literature<sup>32 5</sup>. However, we note that any trial-to-trial variability in decision choice that is not  
325 accounted for explicitly by our model (in terms of reward or information value) would be absorbed into this  
326 decision stochasticity parameter. It is important to recognize that such apparent decision stochasticity could



## Novelty-seeking, information-seeking and addiction

327 either reflect true “noise” (or “undirected” exploration) in human choice behavior, or it could simply reflect  
328 the fact that our model insufficiently capture trial-by-trial variability. In any case, our results suggest that  
329 healthy controls and problem gamblers differ in the information-related component of sequential choice  
330 behavior, and not in other undirected or unexplained aspects of stochasticity in it. Therefore, only  
331 information-driven exploration could constitute a promising future target for the early diagnosis or clinical  
332 intervention of problem gambling<sup>33</sup>. Additionally, by showing information-based exploratory impairments  
333 in problem gamblers, the results of this study are in line with recent findings that assign different behavioral  
334 roles and neurocognitive mechanisms to informative and undirected component of exploration<sup>5-7,34-36</sup>.

335 While our results showed novelty-seeking impairment in problem gamblers, different explanations  
336 may account for this impairment. One possibility is that problem gamblers may quickly jump to conclusion.  
337 After seeing the outcome of 2 out of 3 options, they might be highly confident in their representation of the  
338 environment and the search for novel information results “unnecessary”. Abnormalities in confidence  
339 judgements and metacognitive capacities have been reported in both gambling<sup>37</sup> and substance abuse  
340 disorders<sup>38</sup>. However, it may also be possible that the absence of novelty bonus is due to an inability of  
341 dynamically represent the surrounding environment. Problem gamblers might be unable to represent changes  
342 in the environment, as when new options are available for selection. Model-based impairments have also  
343 been found to be associated with addictive disorders<sup>39 40</sup>, and in particular with problem gambling<sup>41</sup>. Future  
344 experiments should explicitly test these alternative hypotheses.

345 Although our study adds additional insight on information behavior in behavioral addiction, some  
346 limitations may influence the scope of our results. Firstly, in order to have a control group as similar as  
347 possible to the gambling group (Table 1), the number of control participants we were able to include in the  
348 study after pre-screening was 22 (Supplement). The behavioral pattern observed in the control group (Figure  
349 2a, S3a), however, replicates our previous findings on healthy humans playing with the behavioral task  
350 adopted in the current study<sup>6,7</sup>. Furthermore, although testing problem gamblers appears relevant for  
351 minimizing the confounding effects of chemical compounds, most of gambling games involve  
352 exploration/exploitation problems. Therefore, the observed behavioral alterations might have been affected  
353 by excessive gambling experience. However, we observed no differences between strategic and non-strategic  
354 gamblers (who usually play with games that employ different decision strategies, Supplement<sup>42</sup>). Moreover,  
355 our findings on alterations in exploratory behaviors are consistent with previous work on substance addiction  
356 where gambling experience was absent. Therefore, it is unlikely that our findings are an artifact resulting  
357 from more gambling experience. However, we cannot rule out the possibility that the observed differences  
358 might have already been present prior to the onset of gambling disorder instead of being directly induced by  
359 it.

## Novelty-seeking, information-seeking and addiction

360           Our results on novelty-seeking impairment in addiction not only provide insights on information-  
361 seeking alterations in addiction, but also deepens our understanding of information-seeking in general. We  
362 showed that healthy human behavior is motivated by reward gain and information gain, and the later  
363 decomposes into a novelty-specific component, and a general information component. By showing problem  
364 gamblers inappropriately represent novelty but not general information, our results appear to suggest that  
365 both components are not only functional but also biologically dissociable. Information-seeking behaviors are  
366 controlled by an interconnected cortico-basal ganglia network<sup>43</sup> and novelty-seeking is believed to motivate  
367 the brain's reward system<sup>2 44</sup>. However, the biological markers of both novelty and general information  
368 within the information-seeking network are still unknown. Further work is needed to individuate the  
369 mechanisms underlying novelty and general information and whether they are indeed biologically  
370 dissociable.

371           In summary, our findings extend the scientific understanding of human information behavior in  
372 healthy individuals and its impairment in behavioral addiction. Healthy information behavior was motivated  
373 by both novelty and general information. In contrast, problem gamblers showed impairment in novelty-  
374 seeking but not general information-seeking. Our results suggest that information-driven behaviors could be  
375 a promising target for clinical diagnosis and intervention (e.g., behavioral training and therapies,  
376 neurostimulation, etc.). However, whether our framework can be effectively implement in pre-existing  
377 clinical interventions, generalized to each individual patient<sup>45</sup>, generalized to other types of addiction or  
378 other pathologies involving behavioral flexibility (see Supplement) has to be tested in future research.  
379 Methodologically, this work offers promising novel experimental and computational approaches for studying  
380 the mechanisms underlying information valuation in sequential choice behavior in both healthy and  
381 pathological populations.



Novelty-seeking, information-seeking and addiction

382 **ACKNOWLEDGEMENT AND DISCLOSURE**

383 ICD is a researcher supported by F.R.S.-FNRS grant (Belgium). XN is a researcher supported by F.R.S.-  
384 FNRS (Belgium). AC is a research director with the F.R.S.-FNRS (Belgium). This work was in part funded  
385 by ERC Advanced Grant RADICAL to AC. AJY is funded in part by an NIH/NIDA CRCNS grant (R01  
386 DA050373-01). We would like to thank Pauline Deroubaix for helping I.C.D in recruiting participants and  
387 collecting their data and Tali Sharot for comments on previous versions of this manuscript. The authors report  
388 no competing financial interests.

389

Novelty-seeking, information-seeking and addiction

## 390 REFERENCES

- 391 1 Gottlieb, J., Oudeyer, P. Y., Lopes, M. & Baranes, A. Information-seeking, curiosity, and  
392 attention: computational and neural mechanisms. *Trends Cogn Sci* **17**, 585-593,  
393 doi:10.1016/j.tics.2013.09.001 (2013).
- 394 2 Kidd, C. & Hayden, B. Y. The Psychology and Neuroscience of Curiosity. *Neuron* **88**,  
395 449-460, doi:10.1016/j.neuron.2015.09.010 (2015).
- 396 3 Sakaki, M., Yagi, A. & Murayama, K. Curiosity in old age: A possible key to achieving  
397 adaptive aging. *Neurosci Biobehav Rev* **88**, 106-116,  
398 doi:10.1016/j.neubiorev.2018.03.007 (2018).
- 399 4 APA. *Diagnostic and Statistical Manual of Mental Disorders*. (American Psychiatry  
400 Publishing, 2013).
- 401 5 Wilson, R. C., Geana, A., White, J. M., Ludvig, E. A. & Cohen, J. D. Humans use directed  
402 and random exploration to solve the explore-exploit dilemma. *Journal of experimental*  
403 *psychology. General* **143**, 2074-2081, doi:10.1037/a0038199 (2014).
- 404 6 Cogliati Dezza, I., Yu, A. J., Cleeremans, A. & Alexander, W. Learning the value of  
405 information and reward over time when solving exploration-exploitation problems.  
406 *Sci Rep* **7**, 16919, doi:10.1038/s41598-017-17237-w (2017).
- 407 7 Cogliati Dezza, I., Cleeremans, A. & Alexander, W. Should we control? The interplay  
408 between cognitive control and information integration in the resolution of the  
409 exploration-exploitation dilemma. *Journal of experimental psychology. General*,  
410 doi:10.1037/xge0000546 (2019).
- 411 8 Stephens, D. W. & Krebs, J. R. *Foraging Theory*. (Princeton University Press, 1986).
- 412 9 Schulz, E. *et al.* Structured, uncertainty-driven exploration in  
413 real-world consumer choice. *Proceedings of the National Academy of Sciences of the United*  
414 *States of America* (2019).
- 415 10 Smirnov, Y., Koenig, S., Veloso, M. M. & Simmons, R. G. Efficient Goal-Directed  
416 Exploration. *AAAI-96 Proceedings* (1996).
- 417 11 Chung, J. J., Lawrance, N. R. J. & Sukkarieh, S. Learning to soar: Resource-constrained  
418 exploration in reinforcement learning. *The international journal of robotics research* **34**, 158-  
419 172 (2015).
- 420 12 Morris, L. S. *et al.* Biases in the Explore-Exploit Tradeoff in Addictions: The Role of  
421 Avoidance of Uncertainty. *Neuropsychopharmacology* **41**, 940-948,  
422 doi:10.1038/npp.2015.208 (2016).
- 423 13 Blanco, N. J., Otto, A. R., Maddox, W. T., Beevers, C. G. & Love, B. C. The influence of  
424 depression symptoms on exploratory decision-making. *Cognition* **129**, 563-568,  
425 doi:10.1016/j.cognition.2013.08.018 (2013).
- 426 14 Bechara, A. Decision making, impulse control and loss of willpower to resist drugs: a  
427 neurocognitive perspective. *Nat Neurosci* **8**, 1458-1463, doi:10.1038/nn1584 (2005).
- 428 15 Noel, X., Brevers, D. & Bechara, A. A neurocognitive approach to understanding the  
429 neurobiology of addiction. *Curr Opin Neurobiol* **23**, 632-638,  
430 doi:10.1016/j.conb.2013.01.018 (2013).
- 431 16 Hertwig, R. & Erev, I. The description-experience gap in risky choice. *Trends Cogn Sci*  
432 **13**, 517-523, doi:10.1016/j.tics.2009.09.004 (2009).
- 433 17 Leeman, R. F. & Potenza, M. N. Similarities and differences between  
434 pathological gambling and substance use disorders: a focus

Novelty-seeking, information-seeking and addiction

- 435 on impulsivity and compulsivity. *Psychopharmacology* **219**, 469-490 (2012).
- 436 18 Lorains, F. K. *et al.* Strategic and non-strategic problem gamblers differ on decision-  
437 making under risk and ambiguity. *Addiction* **109**, 1128-1137, doi:10.1111/add.12494  
438 (2014).
- 439 19 Joy, S., Fein, D., Kaplan, E. & Freedman, M. Quantifying qualitative features of Block  
440 Design performance among healthy older adults. *Arch Clin Neuropsychol* **16**, 157-170  
441 (2001).
- 442 20 Rescorla, R. A. & Wagner, A. R. A theory of Pavlovian conditioning: Variations in the  
443 effectiveness of reinforcement and nonreinforcement. *Classical conditioning: Current*  
444 *research and theory*, 64-99 (1972).
- 445 21 Bishop, C. M. *Pattern recognition and machine learning*. (2006).
- 446 22 Bromberg-Martin, E. S. & Hikosaka, O. Midbrain dopamine neurons signal preference  
447 for advance information about upcoming rewards. *Neuron* **63**, 119-126,  
448 doi:10.1016/j.neuron.2009.06.009 (2009).
- 449 23 Camp, C. J. I am curious - grey: Information seeking and depression across the adult  
450 lifespan. *Educational Gerontology* **12**, 375-384 (1986).
- 451 24 Gray, K. M. & Tonge, B. J. Are there early features of autism in infants and preschool  
452 children? *J Paediatr Child Health* **37**, 221-226 (2001).
- 453 25 Aderka, I. M., Haker, A., Marom, S., Hermesh, H. & Gilboa-Schechtman, E. Information-  
454 seeking bias in social anxiety disorder. *J Abnorm Psychol* **122**, 7-12,  
455 doi:10.1037/a0029555 (2013).
- 456 26 Van den Driessche, C., Chevrier, F., Cleeremans, A. & Sackur, J. Lower Attentional Skills  
457 predict increased exploratory foraging patterns. *Sci Rep* **9**, 10948,  
458 doi:10.1038/s41598-019-46761-0 (2019).
- 459 27 Hauser, T. U., Moutoussis, M., Consortium, N., Dayan, P. & Dolan, R. J. Increased  
460 decision thresholds trigger extended information gathering across the compulsivity  
461 spectrum. *Transl Psychiatry* **7**, 1296, doi:10.1038/s41398-017-0040-3 (2017).
- 462 28 Goudriaan, A. E., Oosterlaan, J., de Beurs, E., van den Brink, W. Decision making in  
463 gambling disorder: a comparison between pathological gamblers, alcohol dependents,  
464 persons with Tourette syndrome, and normal controls. *Cogn. Brain. Res.*, 137-151,  
465 doi:doi:10.1016/j.cogbrainres.  
466 2005.01.017 (2005).
- 467 29 Marazziti, D. *et al.* Executive function abnormalities in pathological gamblers. *Clin*  
468 *Pract Epidemiol Ment Health* **4**, 7, doi:10.1186/1745-0179-4-7 (2008).
- 469 30 Ersche, K. D., Roiser, J. P., Robbins, T. W. & Sahakian, B. J. Chronic cocaine but not  
470 chronic amphetamine use is associated with perseverative responding in humans.  
471 *Psychopharmacology (Berl)* **197**, 421-431, doi:10.1007/s00213-007-1051-1 (2008).
- 472 31 Camchong, J. *et al.* Frontal hyperconnectivity related to discounting and reversal  
473 learning in cocaine subjects. *Biol Psychiatry* **69**, 1117-1123,  
474 doi:10.1016/j.biopsych.2011.01.008 (2011).
- 475 32 Sutton, R. S. & Barto, A. G. *Reinforcement Learning: An introduction*. (MIT Press, 1998).
- 476 33 Addicott, M. A., Pearson, J. M., Sweitzer, M. M., Barack, D. L. & Platt, M. L. A Primer on  
477 Foraging and the Explore/Exploit Trade-Off for Psychiatry Research.  
478 *Neuropsychopharmacology* **42**, 1931-1939, doi:10.1038/npp.2017.108 (2017).

Novelty-seeking, information-seeking and addiction

- 479 34 Somerville, L. H. *et al.* Charting the expansion of strategic exploratory behavior during  
480 adolescence. *Journal of experimental psychology. General* **146**, 155-164,  
481 doi:10.1037/xge0000250 (2017).
- 482 35 Krueger, P. M. Strategies for exploration in the domain of losses. *Judgement and*  
483 *Decision Making* **12**, 104-117 (2017).
- 484 36 Zajkowski, W. K., Kossut, M. & Wilson, R. C. A causal role for right frontopolar cortex  
485 in directed, but not random, exploration. *Elife* **6**, doi:10.7554/eLife.27430 (2017).
- 486 37 Brevers, D. *et al.* Impaired Metacognitive Capacities in Individuals  
487 with Problem Gambling. *J Gambl Stud* (2012).
- 488 38 Hoven, M. *et al.* Abnormalities of confidence in psychiatry: an overview and future  
489 perspectives. *Transl Psychiatry* **9**, 268, doi:10.1038/s41398-019-0602-7 (2019).
- 490 39 Simon, D. A. & Daw, N. D. in *Computational Neuroscience of Drug Addiction* Vol. 10 (eds  
491 B. Gutkin & S.H. Ahmed) (Springer Series in Computational Neuroscien, 2012).
- 492 40 Sebold, M. *et al.* Model-based and model-free decisions in alcohol dependence.  
493 *Neuropsychobiology* **70**, 122-131, doi:10.1159/000362840 (2014).
- 494 41 Wyckmans, F. *et al.* Reduced model-based decision-making in gambling disorder  
495 . *Sci Rep* (2019).
- 496 42 Grant, J. E., Odlaug, B. L., Chamberlain, S. R. & Schreiber, L. R. Neurocognitive  
497 dysfunction in strategic and non-strategic gamblers. *Prog Neuropsychopharmacol Biol*  
498 *Psychiatry* **38**, 336-340, doi:10.1016/j.pnpbp.2012.05.006 (2012).
- 499 43 White, J. K. *et al.* A neural network for information seeking. *Nat Commun* **10**, 5168,  
500 doi:10.1038/s41467-019-13135-z (2019).
- 501 44 Kakade, S. & Dayan, P. Dopamine: generalization and bonuses. *Neural Netw* **15**, 549-  
502 559 (2002).
- 503 45 Fisher, A. J., Medaglia, J. D. & Jeronimus, B. F. Lack of group-to-individual  
504 generalizability is a threat to human subjects research. *Proc Natl Acad Sci U S A* **115**,  
505 E6106-E6115, doi:10.1073/pnas.1711978115 (2018).
- 506
- 507

Novelty-seeking, information-seeking and addiction

508

## SUPPLEMENTARY MATERIAL

509 **Novelty-seeking impairment in addiction**

510

511 **Irene Cogliati Dezza<sup>1,2,\*</sup>, Xavier Noel<sup>3</sup>, Axel Cleeremans<sup>1</sup>, Angela J. Yu<sup>4</sup>**

512 <sup>1</sup>Centre for Research in Cognition & Neurosciences, ULB Neuroscience Institute, Université Libre de

513 Bruxelles, Belgium

514 <sup>2</sup>Department of Experimental Psychology, Faculty of Brain Sciences, University College London,

515 London, UK

516 <sup>3</sup>Faculty of Medicine, Université Libre de Bruxelles, Belgium

517 <sup>4</sup>Department of Cognitive Science, University of California San Diego, United States

518

Novelty-seeking, information-seeking and addiction

## 519 **SUPPLEMENTARY METHODS**

### 520 **Clinical and demographic characteristics**

521 Inclusion/exclusion criteria were examined the day before the experiment by conducting a short telephone  
522 interview as well as on the day of the experiment by filling self-reported questionnaires presented in a  
523 random order during the last part of the experimental session. The telephone interview was adopted as pre-  
524 screening for both gamblers and controls. We specifically asked for information concerning age, gender,  
525 frequency of gambling per week (problem gamblers) or last gambling experience (for controls),  
526 consumption of alcohol per week or substance (including legal and illegal drugs), inability to stop drinking  
527 alcohol, undergoing psychological treatments, and possible brain surgeries underwent in the past. In the  
528 following two sections, we describe the clinical and demographic characteristics of problem gamblers and  
529 healthy controls.

#### 530 *Problem gamblers*

531 Gambling severity was evaluated using the Canadian Problem Gambling Index (CPGI <sup>1</sup>). Eight gamblers  
532 were classified as low level of problem gambling with  $1 \leq \text{GPCI} \leq 3$ , thirteen gamblers with moderate level  
533 of problem gambling (leading to some negative consequences;  $4 \leq \text{GPCI} \leq 7$ ), and nineteen as exhibiting  
534 pathological problem gambling (with negative consequences and possible loss of control;  $\text{GPCI} \geq 8$ ). We  
535 also interviewed participants using DSM-V (French translation) and we observed that 52.4% of problem  
536 gamblers met the DSM-V criteria for gambling disorder <sup>2</sup>. The relatively low level of gambling addiction  
537 presented in this population is the result of selecting participants who showed no co-morbidities with  
538 substance abuse or alcohol use disorder. Specifically, to be able to tell apart effects of addictive behaviors  
539 *per se* on decision-making from effects of long-term intake of chemical compound, we tested problem  
540 gamblers with no use (N= 31, Drug Abuse Screening Test <sup>3</sup>- DAST =0) or non-problematic use (N=9,  
541 DAST =1) of legal and illegal substances and with absence of alcohol addiction (Alcohol Use Disorders  
542 Identification Test <sup>4</sup>- AUDIT- <12 in men and AUDIT < 11 in women, M = 4.625, SD = 3.868; N=30 did  
543 not show any misuse of alcohol AUDIT < 8). We also controlled for smoking addiction using the Fagerström  
544 Test for Nicotine Dependence- FTND <sup>5</sup>. Seven participants reported to smoke, but only 2 were classified  
545 with a mid-dependence and 2 with a weak-dependence, the other 3 were not dependent. Given that the main  
546 statistical results remained unchanged after removing those participants, we decided to include them in all  
547 the analyses. Additionally, to avoid the scenario that participants under psychological treatment may have  
548 developed a certain type of cognitive strategy over their decision processes, we included only participants  
549 who were not undergoing or seeking for psychological treatment. Moreover, we only included regular  
550 gamblers that were gambling at least once per week. Finally, we recruited both strategic problem gamblers  
551 (sport betting, poker, black jack; N=22) and non-strategic problem gamblers (bingo, lotto, slot machine,  
552 roulette; N=18) <sup>6</sup>. Given that no behavioral difference was found between the two sub-types (in line with

## Novelty-seeking, information-seeking and addiction

553 <sup>7</sup>), we combined strategic and non-strategic gamblers in the same gambling group in all analyses reported  
554 in this manuscript.

### 555 *Healthy controls*

556 The inclusion criteria for the healthy control group were as follow: CPGI=0 and no gambling experience in  
557 the past 12 months. 40% of control participants reported to have gambled in the past years, whereas the rest  
558 of the group reported to have never gambled in their life. As for the problem gambling group, we only  
559 included participants who scored DAST < 2 (with 17 subjects DAST = 0) and AUDIT < 12 (for the men),  
560 11 (for the women) (with 17 subjects scored AUDIT < 8; M = 5.3, SD = 3.1). Three participants reported to  
561 smoke, two of them showed no sign of addiction (FTND = 0 ; 2) and one showed mid-level of addiction  
562 (FTND = 7). Removing this participant did not change the main statistical results, therefore the participant  
563 was included in all the analyses.

### 564 **Behavioral Task**

565 In the decision-making task, the influence of reward and information on choices is orthogonalized in the  
566 first free-choice trial (since after the commencement of the first free-choice trial, subjects tend to choose  
567 the more rewarding options more often, thus reward and information become anti-correlated). In particular,  
568 adding a forced-choice task before the actual decision task allows to control for available information and  
569 the reward magnitude associated with each option (i.e., options associated with the lowest amount of  
570 information were least associated with experienced reward values)<sup>8</sup>. This procedure allows to dissociate  
571 between information-driven exploration and undirected exploration. For instance, in the unequal sampling  
572 condition, the deck never selected during the forced choice task has highest informative value (it is  
573 completely unknown to participants) but it has no reward value associated with. By choosing that deck,  
574 participants are engaging in information-driven exploration. On the contrary, in the equal information  
575 condition, no differences are observed in terms of information. Therefore, whenever participants choose to  
576 explore, this strategy is not driven by an informative drive but only by decision noise<sup>8</sup>.

577 As reported in the main text, the goal of the decision-making task is to maximize the final gain. The final  
578 gain is represented as the amount of points earned throughout the experiment. The total gain is showed to  
579 participants at the end of the experiment and converted in a monetary payoff (0.01 euros every 60 points).  
580 We adopted the same conversion procedure for both groups. However, because gamblers play regularly  
581 with higher amounts of money than those offered in our study, their contribution in the study was payed 2.5  
582 more than in healthy controls. This modification was introduced in order to minimize the differences in  
583 motivation between the two groups during the experiment.

584 Furthermore, the reward was generated from a truncated Gaussian distribution with a fixed standard  
585 deviation of 8 points, and then rounded to the nearest integer. The generative mean for each deck was set  
586 to 30 (Low Reward Context) and 50 (High Reward Context) points and adjusted by +/- 0, 4, 12, & 20 points



## Novelty-seeking, information-seeking and addiction

587 (i.e., the generative means ranged from 10 to 70 points), to avoid the possibility that participants might be  
588 able to discern the generative mean for a deck after a single observation. The 3 decks of cards had the same  
589 generative means in 50% of the games (*equal reward*) and different means in the rest of the games (*unequal*  
590 *reward*). In the unequal reward condition (50% of the total games), the generative means differed so that  
591 two options had higher means compared to the third one in 25% of the total games (High Reward Context)  
592 and had lower means in the remaining games of the unequal reward condition (Low Reward Context). The  
593 appearance of the equal and unequal reward conditions was randomized. Participants were told that during  
594 the forced-choice task of certain games they could sample options at different rates, and that the decks of  
595 cards did not change during the same game, but were replaced by new decks at the beginning of each new  
596 game. However, they were not informed of the details of the reward manipulation or the underlying  
597 generative distribution adopted during the experiment. Contrary to our previous versions of this task<sup>9,10</sup>, in  
598 half of the games of the equal reward-equal information condition, we introduced an unusually high reward  
599 outcome (with respect of the deck mean in that game) for a specific option (e.g., 90 points) the first time  
600 that this option was selected in the forced-choice task (subsequently the mean of the deck was set to its  
601 original value). This manipulation was introduced as a control condition in order to test whether gamblers'  
602 persevere in choosing a generally poor option that they initially have a good experience with (the 'big  
603 win' hypothesis for gambling addiction<sup>11</sup>).

### 604 **Computational Modelling**

605 In this section, we first describe the RL model already validated for our task (gamma knowledge RL model-  
606 gkRL<sup>9</sup>). Next, we describe our novel implementation (nkRL). Lastly, we report the information concerning  
607 model fitting, selection and parameter recovery.

#### 608 *gkRL*

609 The gkRL model learns reward values using the delta learning rule<sup>12</sup>:

$$610 \quad Q_{t+1,j}(c) = Q_{t,j}(c) + \alpha \times \delta_{t,j}$$

$$611 \quad \text{where, } \delta_{t,j} = R_{t,j}(c) - Q_{t,j}(c) \text{ (S1)}$$

612 where  $Q_{t,j}(c)$  is the expected reward value for trial  $t$  and game  $j$  and  $\delta_{t,j}$  is the *prediction error*, which  
613 quantifies the discrepancy between the previous predicted outcome  $Q_{t,j}(c)$  and the actual outcome  
614  $R_{t,j}$  obtained at trial  $t$  and game  $j$ . Since participants were told that games were independent from one  
615 another,  $Q_0$  is initialized at the beginning of each game to the global estimate of the expected reward values  
616 for each deck. We previously showed that this initialization was better able to capture healthy participants'  
617 behaviour than learning  $Q_0$  on a trial-by-trial basis<sup>9</sup>. In addition, gkRL accumulates information over time



## Novelty-seeking, information-seeking and addiction

618 (i.e., the amount of observations toward each deck) where the importance of already acquired information  
619 is tuned by the information magnitude  $\gamma$  :

$$620 \quad I_{t,j}(c) = \left( \sum_1^t i_{t,j}(c) \right)^\gamma$$

$$621 \quad \text{where, } i_{t,j}(c) = \begin{cases} 0, & \text{choice} \neq c \\ 1, & \text{choice} = c \end{cases} \quad (\text{S2})$$

622  $\gamma$  defines both the degree of non-linearity in the amount of observations obtained from options after each  
623 observation and its related importance. Under high  $\gamma$  the information already gained is highly relevant,  
624 whereas the information to be acquired is less relevant or penalized.  $\gamma$  is constrained to be  $> 0$ . Next, in the  
625 gkRL the predicted value of a deck is a combination of reward and information where the importance of  
626 information relative to experienced reward value is controlled by the information integration  $\omega$ :

$$627 \quad V_{t,j}(c) = Q_{t+1,j}(c) - I_{t,j}(c) * \omega \quad (\text{S3})$$

628  $\omega$  modulates the devaluation of previous experiences. With large  $\omega$  the devaluation of experienced rewards  
629 increases favoring the selection of unknown options. Note that the effect of  $I_{t,j}(c)$  is subtractive, because  
630 as more knowledge is gained about an option, less knowledge remains to be gained, thus the choice value  
631 decreases as  $I_{t,j}(c)$  increases. Therefore, gkRL allows the exploration of unknown options by dynamically  
632 devaluating the selection of previous alternatives. Finally, a choice is made by entering choice values into  
633 the softmax function<sup>13</sup>, as follows:

$$634 \quad P(c/V_{t,j}(c_i)) = \frac{\exp(\beta \times V_{t,j}(c))}{\sum_i \exp(\beta \times V_{t,j}(c_i))} \quad (\text{S4})$$

635 where  $\beta$  is the inverse temperature that determines the degree to which choices are randomized by decision  
636 stochasticity (or choice variability).

### 637 *nkRL*

638 If, on one hand gkRL allows to solve exploration and exploitation problems on our decision-making task<sup>9</sup>,  
639 on the other hand it cannot individuate the relative influence of general information and novelty on choices.  
640 Indeed, in gkRL information-driven exploration is allowed by dynamically devaluating previous options in  
641 order to explore new alternatives and by tuning the information magnitude; however, this formulation  
642 cannot differentiate the relative influence of general information and novelty on choices, since they are  
643 completely anti-correlated in gkRL. Therefore, we dissociate general information from novelty by utilizing  
644 a novel RL model i.e., nkRL.

645 As described in the main text nkRL computes expected reward values as in Eq. S1. Our novel model,  
646 however computes choice values as follows:

## Novelty-seeking, information-seeking and addiction

647 
$$V_{t,j}(c) = Q_{t+1,j}(c) + \sum_1^t i_{t,j}(c) * k + 1_{unseen} * v \quad (S5)$$

648 *Model fitting and Model selection*

649 The models' parameters were estimated by fitting the model to trial-by-trial participants' free choices (~600  
650 choices for each subject). The fitting procedure was performed using MATLAB function *fminsearchbnd*  
651 and iterated for 15 randomly chosen multiple starting points in order to minimize the chance of finding a  
652 local optimum instead of a global one. The fitting procedure was validated by running a recovery analysis:  
653 the nkRL (gkRL) model was simulated on the task using the retrieved parameter estimates to generate  
654 synthetic behavioral data and then the fitting procedure was applied to the synthetic data in order to check  
655 whether previously estimated parameters were indeed recovered. For model comparisons, negative log  
656 likelihoods obtained during the fitting procedure were used to compute model evidence (the probability of  
657 obtaining the observed data given a particular model). We adopted an approximation to the (log) model  
658 evidence, namely the Bayesian Information Criterion (BIC)<sup>14</sup>. We checked the model comparison outcome  
659 by computing a confusion matrix and checking whether data generated from a model was indeed best  
660 explained by that model. In order to inspect the fitting procedure for overfitting we adopted cross validation  
661 procedure<sup>15</sup>. We fitted nkRL and gkRL to 70% of the trials and we tested their ability to predict choices on  
662 future data (30% of the trials) compared to a simpler nested model (i.e., standard RL model –sRL- which  
663 enters directly enters reward values  $Q_{t+1,j}$  into Eq. S4 without integrating information). We then adopted  
664 the likelihood ratio test to determine if the better fit of complex models (i.e., nkRL and gkRL) was due to  
665 noise captured in the data. Both nkRL and gkRL were correctly able to predict future choices.

666 **Statistical analysis**

667 Statistical analysis was performed using RStudio (<https://www.rstudio.com/>). When violations of  
668 parametric tests were indicated, non-parametric tests were performed. *P*-values < .05 were considered  
669 significant.

670

Novelty-seeking, information-seeking and addiction

## 671 SUPPLEMENTARY RESULTS

### 672 Information behavior in healthy individuals and problems gamblers

#### 673 *Reward Context*

674 We investigated whether differences in reward-driven and information-driven strategies between the two  
675 groups could be explained by reward contexts. To investigate the effect of reward context, we computed  
676 *reward-driven*, *information-driven* and *other* in the first free choice trial of the unequal information  
677 condition under High Reward Context (i.e., the generative mean of each deck was set to 30 points and  
678 adjusted by - 0, 4, 12, & 20 points) and Low Reward context (i.e., the generative mean of each deck was  
679 set to 30 points and adjusted by + 0, 4, 12, & 20 points). We conducted a 2 (Group: PGs, Controls) X 2  
680 (Reward Context: Low Reward, High Reward) X 3 (Strategy: Reward-driven, Information-driven, Other)  
681 between-subject ANOVA. Besides the effects of strategy ( $p < 10^{-15}$ ) and strategy X group ( $p < 10^{-3}$ ) already  
682 reported in the main text, the results showed an interaction of strategy X Reward Context  $F(2, 360) = 33.1$ ,  
683  $p < 10^{-13}$ , whereas we did not find a general effect of Reward Context, Group X Reward Context, Group X  
684 Reward Context X Strategy (all  $p > 0.958$ ). Post-hoc comparisons in the High Reward Context revealed an  
685 increase in *reward-driven* in problem gamblers ( $M = 0.554$ ,  $SD = 0.165$ ) compared to controls ( $M = 0.437$ ,  
686  $SD = 0.21$ ),  $p = .04$ ; a decrease in *information-driven* in problem gamblers ( $M = 0.276$ ,  $SD = 0.194$ )  
687 compared to controls ( $M = 0.419$ ,  $SD = 0.271$ ),  $p = .043$ ; whereas *other* did not differ between groups  $p >$   
688  $0.2$ . Additionally, post-hoc comparisons in the Low Reward Context revealed an increase in *reward-driven*  
689 in problem gamblers ( $M = 0.339$ ,  $SD = 0.164$ ) compared to controls ( $M = 0.29$ ,  $SD = 0.181$ ),  $p = .007$ ; a  
690 decrease in *information-driven* in problem gamblers ( $M = 0.479$ ,  $SD = 0.217$ ) compared to controls ( $M =$   
691  $0.63$ ,  $SD = 0.261$ ),  $p = .0075$ ; and an increase in *other* in problem gamblers ( $M = 0.123$ ,  $SD = 0.112$ )  
692 compared to controls ( $M = 0.08$ ,  $SD = 0.117$ ),  $p = .047$  (Figure S1). Moreover, both groups showed a  
693 decrease in *information-driven* and an increase in both *reward-driven* and *other* in High Reward Context  
694 compared to Low Reward Context (all  $p$  values  $< .05$ ). These results replicate our previous findings on  
695 reward context and the resolution of the exploration-exploitation trade-off<sup>9,10</sup>.

#### 696 *Reward Condition*

697 In this section, we investigate whether differences in reward-driven and information-driven strategies  
698 between the two groups could be explained by distinct reward conditions (whether the Gaussian means of  
699 the decks were equal or unequal). A 2 (Group: PGs, Controls) X 2 (Reward Condition: Equal Reward,  
700 Unequal Reward) X 3 (Strategy: Reward-driven, Information-driven, Other) between-subject ANOVA.  
701 Besides the effects of strategy ( $p < 10^{-15}$ ) and strategy X group ( $p < 10^{-6}$ ) already reported in the main text,  
702 the results showed an interaction of strategy X Reward Condition  $F(2, 360) = 46.83$ ,  $p < 10^{-15}$ , whereas we  
703 did not find a general effect of Reward Condition, Group X Reward Condition, Group X Reward Condition

## Novelty-seeking, information-seeking and addiction

704 X Strategy (all  $p > 0.807$ ) suggesting that the observed decision-making impairments were independent on  
705 the reward conditions subjects were in.

### 706 *Equal sampling scenario*

707 In this section, we investigate whether the impairment in exploration also arises when exploration was not  
708 driven by an informative drive. To do so, we estimated the frequency of undirected exploration and reward-  
709 driven strategy in the first-free choice trials of the equal information condition i.e. when options have been  
710 seen the same number of times during the forced-choice task. Choices were classified as *reward-driven*  
711 when participants chose the deck with the highest average points and *undirected exploration* otherwise. A  
712 2 (Group: PGs, Controls) X 2 (Strategy: Undirected Exploration, Reward-driven) between ANOVA  
713 revealed an effect of strategy  $F(2,120) = 205.4, p < 10^{-15}$ . However, the interaction effect Groups X Strategy  
714 and the Group effect were not significant ( $p > .05$ ; Figure 2b), suggesting that, when information is deployed  
715 equally among options, problem gamblers engage in exploratory behaviors similarly to healthy controls.

### 716 *Familiarity vs. Ignorance*

717 In Figure 2c of the main text we showed that both groups preferred familiar options compared to options  
718 they were more ignorant about ( $p < 10^{-4}$ ). In order to confirm this result, we computed participant's tendency  
719 to choose Most-Sampled and Least-Sampled alternatives with the respect of a baseline (i.e., mean tendency  
720 to choose Most-Sampled and Least-Sampled options across all subjects). A Wilcoxon Signed Rank Test  
721 showed higher tendency to choose Most-Sampled options over baseline ( $M_{PG}=1.35, SD_{PG} = 0.273; M_{CON}$   
722  $=1.21, SD_{CON} = 0.162$ ) compared to Least-Sampled options ( $M_{PG}=0.648, SD_{PG} = 0.219; M_{CON}=0.791,$   
723  $SD_{CON} = 0.155$ ) in both groups (all  $p < 10^{-3}$ ; Figure S2 a). Additionally, we computed participant's tendency  
724 to choose Least-Sampled and Mid-Sampled alternatives with the respect of a baseline (i.e., mean tendency  
725 to choose Least-Sampled and Mid-Sampled options across all subjects). A Wilcoxon Signed Rank Test  
726 showed higher tendency to choose Least-Sampled options over baseline ( $M_{PG}=1.27, SD_{PG} = 0.48; M_{CON}$   
727  $=1.35, SD_{CON} = 0.263$ ) compared to choose Mid-Sampled options ( $M_{PG}=0.735, SD_{PG} = 0.171; M_{CON}=0.653,$   
728  $SD_{CON} = 0.159$ ) in both groups (all  $p < 10^{-3}$ ; Figure S2 b). Therefore, both groups preferred most familiar  
729 options over most unknown over intermediate alternatives. We also computed the same tendency on first  
730 free choice trials. While both groups prefer novel options over intermediate alternatives (all  $p < 10^{-3}$ ) (S2  
731 d), healthy controls reversed their tendency selecting more often novel options ( $M=1.34, SD = 0.65$ ) over  
732 familiar ones ( $M=0.656, SD = 0.393$ ),  $p < 10^{-3}$  (Figure S2 c). This novelty-familiarity shift was absent in  
733 problem gamblers who showed no preference between novel ( $M=1.06, SD = 0.528$ ) and familiar options  
734 ( $M=0.943, SD = 0.358$ ),  $p = 0.41$  (Figure S2 c).

### 735 *Novelty vs. General Information*

736 In the main text and in the previous section we showed that both groups preferred most familiar options  
737 over novel options, and this tendency was reversed in the control group during the first free choice trials.

## Novelty-seeking, information-seeking and addiction

738 We further showed that both groups preferred novel options over mid-known alternatives in the first free  
739 choice trials (Figure S2 d). In order to understand whether the information-seeking impairment in problem  
740 gamblers is a result of a novelty-seeking impairment or of general information impairment, we directly  
741 compared the two groups preference over mid-known alternatives in the first free choice trial of the unequal  
742 information condition. If the information-seeking impairment is driven by general information, gamblers  
743 should also decrease the selection of mid-known alternative (which in the free choice trial of the unequal  
744 information condition corresponds to the option sampled twice during the forced choice task, and therefore  
745 less known to them). A Wilcoxon Signed Rank Test showed higher tendency to choose Mid-Sampled  
746 options in problem gamblers ( $M = 0.27$ ,  $SD = 0.084$ ) compared to controls ( $M = 0.203$ ,  $SD = 0.112$ ;  $p =$   
747  $0.015$ ) suggesting that information-seeking impairment in gamblers might be specific to the representation  
748 of novelty, rather than an impairment in general information. To better clarify this point, we turn to the  
749 model based analyses.

### 750 **Novelty-seeking in healthy individuals and novelty failure in problem gamblers**

#### 751 *Nested models*

752 Even though the combination of reward and information was already shown in healthy human subjects<sup>9 10</sup>,  
753 we checked if this was still the case in our experimental groups (problem gamblers and healthy controls).  
754 To do so, we compare gkRL to a simpler nested model i.e., sRL (which doesn't integrate information into  
755 the value function). A Wilcoxon Signed Rank Test showed a decrease in  $BIC_{gkRL}$  ( $M_{PGs} = 876.7$ ,  $SD_{PGs} =$   
756  $246$ ;  $M_{CON} = 880.9$ ,  $SD_{CON} = 157.9$ ) compared to  $BIC_{sRL}$  ( $M_{PGs} = 925.3$ ,  $SD_{PGs} = 216.5$ ;  $M_{CON} = 941.9$ ,  $SD_{CON}$   
757  $= 156.8$ ) both in problem gamblers ( $p < 10^{-7}$ ) and controls ( $p < 10^{-5}$ ). The results suggest that the  
758 combination of reward and information better accounts for the learning process in both groups compared  
759 to only computing reward predictions, essentially replicating our previous findings<sup>9</sup>.

#### 760 *gkRL's parameters*

761 We compared the estimates of the gkRL's parameters obtained by fitting the model to participants' free-  
762 choices. A Wilcoxon Signed Rank Test showed a decrease in information integration parameter  $\omega$  in  
763 problem gamblers ( $M = -14.2$ ,  $SD = 95.4$ ) compared to controls ( $M = 2.93$ ,  $SD = 36.5$ ),  $p = .003$  (Figure  
764 S3a), and an increase in the information magnitude parameter  $\gamma$  in gamblers ( $M = 1.15$ ,  $SD = 1.38$ )  
765 compared to controls ( $M = 0.145$ ,  $SD = 0.352$ ),  $p = .005$  (Figure S3b). Additionally, the analysis showed a  
766 smaller learning rate  $\alpha$  in problem gamblers ( $M = 0.391$ ,  $SD = 0.264$ ) compared to controls ( $M = 0.534$ ,  $SD$   
767  $= 0.206$ ),  $p = .038$ , suggesting a slower integration of new available reward outcome from the environment  
768 (Figure S3c). Lastly, the analysis showed no difference in the softmax parameter  $\beta$  between the two groups,  
769  $p = .302$  ( $M_G = 0.599$ ,  $SD_G = 1.199$ ;  $M_C = 0.139$ ,  $SD_C = 0.073$ , (Figure S3d).

#### 770 *nkRL vs. gkrl*

## Novelty-seeking, information-seeking and addiction

771 We compared the ability of nkRL to explain participants' behavior compared to a previous RL model of  
772 the same task (i.e., gkRL; Supplement). A Wilcoxon Signed Rank Test showed no difference between the  
773 BIC of either model in each group ( $BIC_{gkRL}: M_{PGs} = 876.7, SD_{PGs} = 246; M_{CON} = 880.9, SD_{CON} = 157.9;$   
774  $BIC_{nkRL}: M_{PGs} = 894.6, SD_{PGs} = 231.4; M_{CON} = 879.9, SD_{CON} = 163; p_{PGs} = 0.86$  and controls  $p_{CON} = 0.88$ ).  
775 Thus, gkRL and nkRL are equally good in explaining overall participants' choices (Figure 3a, b). However,  
776 in order to increase the probability of accurately estimating individuals' model parameters, both models  
777 were fitted to all free choices. Being the first free trials the differences between the two  
778 groups are mostly observed, we simulated both models using the parameters estimated. The rationale is that  
779 the differences between the two models in predicting participants' behavior may occur in the first free  
780 choice trial only. And, fitting the models to all free choices may average out the differences, if any, in the  
781 first free choice trials. In order to tell a part potential differences between gkRL and nkRL in the first free  
782 choice trial, we simulated both models using the parameters estimated during the fitting procedure and  
783 analyzed their predictions in both first and last free trials. In particular, we analyzed the models' tendency  
784 to choose Most-Sampled and Least-Sampled alternatives in the first and last free-choice trials. Both models  
785 predict a "novelty-familiarity" shift for the control groups ( $p < 0.001$ , as shown in participants' data Figure  
786 2e; Figure 3d, f). However, gkRL predicts increased preferences toward frequently selected options for  
787 gamblers ( $p < 0.01$ ; Figure 3e), while nkRL predicts no difference between familiar and novel options ( $p >$   
788  $0.05$ , Figure 3c). Therefore, only our novel model was able to reproduce the behavioral pattern observed in  
789 problem gamblers' data during the first free choice trials.

### 790 **Personality traits**

791 In this section, we explore the correlations between model parameters and personal traits and the individual  
792 differences between problem gamblers and controls.

793 We observed significant correlations in problem gamblers between the novelty bonus  $v$  and working memory  
794 capacity ( $r = 0.371, p = 0.018, p_{fdr} = 0.037, n = 40$ ; Figure 4d), sensation seeking (measured using sensation-  
795 seeking scale -SSS; <sup>22</sup>;  $r = 0.321, p = 0.043, p_{fdr} = 0.043, n = 40$ ) and sensitivity to reward (measured using  
796 punishment and reward sensitivity questionnaire- SPSRQ; <sup>23</sup>;  $r = 0.354, p = 0.025, p_{fdr} = 0.037, n = 40$ ).  $p_{fdr}$   
797 is the p-value after correcting for multiple comparison. Additionally, the knowledge parameter  $\kappa$  positively  
798 correlated with sensation seeking ( $r = 0.344, p = 0.03, n = 40$ ). Also, we observed a negative correlation  
799 between softmax parameter  $\beta$  and positive mood (computed using PANAS- Table1;  $r = -0.314, p = 0.049, n$   
800  $= 40$ ), suggesting that the more gamblers were feeling enthusiastic and active the more they were flexible in  
801 their decision policy.

802 We conclude our analyses by comparing individual differences between the two groups to investigate  
803 whether personal traits could explain the differences observed throughout our analyses. We focus on  
804 intolerance of uncertainty (EII <sup>25</sup>), impulsivity (UPPS-P <sup>26</sup>), sensation-seeking (SSS <sup>23</sup>), and sensitivity to



## Novelty-seeking, information-seeking and addiction

805 punishment and reward (SPSRQ<sup>24</sup>). Comparisons between healthy controls and problem gamblers revealed  
806 no differences in the scores obtained from EII ( $p = .785$ ,  $BF_{01} = 3.61$ ), UPPS-P ( $p = .217$ ,  $BF_{01} = 1.89$ ), SSS  
807 ( $p = .483$ ,  $BF_{01} = 3.02$ ), and SPSRQ (sensitivity to reward  $p = .399$ ,  $BF_{01} = 2.81$ ; sensitivity to punishment  $p$   
808  $= .266$ ,  $BF_{01} = 2.4$ ), suggesting that the behavioral alterations observed in problem gamblers are unlikely to  
809 be explained as differences in terms of personality traits (or in some cases there was not substantial evidence  
810 in favor of the alternative hypothesis). These results appear to suggest that information-seeking impairments  
811 in addictive disorders might be related to a process or mechanism that is independent from individual  
812 subjective preferences toward uncertainty, novelty, and reward.

### 813 **The ‘big win’ hypothesis**

814 The results reported in this study showed that problem gamblers’ decision-making alterations when solving  
815 our sequential decision-making were driven by alterations in information behavior as a consequence of a  
816 failure to represent or incorporate novelty. However, these parametric alterations might have been  
817 confounded by the inability of problem gamblers of moving away from an option after experiencing fairly  
818 positive outcomes in the past, i.e., the ‘big win’ hypothesis. To better investigate this point, we computed the  
819 empirical probability of choosing an option associated with an unusually high score (“big win” options) when  
820 first selected in the forced-choice task. A two-sample t test showed no differences in the probability of  
821 choosing the “big win” option in problem gamblers ( $M = 0.607$   $SD = 0.187$ ) compared to controls ( $M = 0.596$   
822  $SD = 0.144$ ),  $p = .798$  suggesting that alterations in decision-making observed in problem gamblers were not  
823 driven by their particular persistence in choosing options associated with unusually good outcomes in the  
824 past.

### 825 **Beyond gambling addiction**

826 We investigate whether the decision-making task we adopted (and related computational model) might be  
827 able to explain other psychopathologies. We observed a positive correlation between Beck Depression  
828 Inventory (BDI) and undirected exploration ( $r = 0.3$ ,  $p = 0.048$ ,  $n = 62$ ) suggesting that the more participants  
829 were scoring high on the depression scale the more they were increasing undirected exploration as already  
830 observed in<sup>16</sup>. We additionally observed a negative correlation between the learning rate computed estimated  
831 nkRL model and BDI ( $r = -0.3$ ,  $p = 0.045$ ,  $n = 62$ ) and a positive correlation between the softmax parameter  
832  $\beta$  and BDI ( $r = 0.3$ ,  $p = 0.02$ ,  $n = 62$ ).

Novelty-seeking, information-seeking and addiction

## 833 SUPPLEMENTARY REFERENCES

- 834 1 Ferris, J. & Wynne, H. The Canadian problem gambling index: Final report. (Canadian  
835 Centre on Substance Abuse., Ottawa (ON)  
836 , 2001).
- 837 2 APA. *Diagnostic and Statistical Manual of Mental Disorders*. (American Psychiatry  
838 Publishing, 2013).
- 839 3 Skinner, H. A. The Drug Abuse Screening Test. *Addict Behav* **7**, 363-371 (1982).
- 840 4 Babor, T. F., de la Fuente, J. R., Saunders, J. & Grant, M. (World Health Organization).
- 841 5 Fagerström, K. O. Measuring degree of physical dependence to tobacco smoking with  
842 reference to individualization of treatment. *Addictive Behaviors*, 235–241 (1978).
- 843 6 Lorains, F. K. *et al.* Strategic and non-strategic problem gamblers differ on decision-  
844 making under risk and ambiguity. *Addiction* **109**, 1128-1137, doi:10.1111/add.12494  
845 (2014).
- 846 7 Grant, J. E., Odlaug, B. L., Chamberlain, S. R. & Schreiber, L. R. Neurocognitive  
847 dysfunction in strategic and non-strategic gamblers. *Prog Neuropsychopharmacol Biol*  
848 *Psychiatry* **38**, 336-340, doi:10.1016/j.pnpbp.2012.05.006 (2012).
- 849 8 Wilson, R. C., Geana, A., White, J. M., Ludvig, E. A. & Cohen, J. D. Humans use directed  
850 and random exploration to solve the explore-exploit dilemma. *Journal of experimental*  
851 *psychology. General* **143**, 2074-2081, doi:10.1037/a0038199 (2014).
- 852 9 Cogliati Dezza, I., Yu, A. J., Cleeremans, A. & Alexander, W. Learning the value of  
853 information and reward over time when solving exploration-exploitation problems.  
854 *Sci Rep* **7**, 16919, doi:10.1038/s41598-017-17237-w (2017).
- 855 10 Cogliati Dezza, I., Cleeremans, A. & Alexander, W. Should we control? The interplay  
856 between cognitive control and information integration in the resolution of the  
857 exploration-exploitation dilemma. *Journal of experimental psychology. General*,  
858 doi:10.1037/xge0000546 (2019).
- 859 11 Kassinove, J. I. & Schare, M. L. Effects of the "near miss" and the "big win" on  
860 persistence at slot machine gambling. *Psychol Addict Behav* **15**, 155-158 (2001).
- 861 12 Rescorla, R. A. & Wagner, A. R. A theory of Pavlovian conditioning: Variations in the  
862 effectiveness of reinforcement and nonreinforcement. *Classical conditioning: Current*  
863 *research and theory*, 64-99 (1972).
- 864 13 Bishop, C. M. *Pattern recognition and machine learning*. (2006).
- 865 14 Schwarz, G. Estimating the dimension of a model. *Ann. Stat* **6**, 461-464 (1978).
- 866 15 Daw, N. D. in *Affect, Learning and Decision Making, Attention and Performance XXIII*  
867 (eds E.A. Phelps, T.W. Robbins, & M. Delgado) (Oxford University  
868 Press, 2009).
- 869 16 Blanco, N. J., Otto, A. R., Maddox, W. T., Beevers, C. G. & Love, B. C. The influence of  
870 depression symptoms on exploratory decision-making. *Cognition* **129**, 563-568,  
871 doi:10.1016/j.cognition.2013.08.018 (2013).  
872



## Novelty-seeking, information-seeking and addiction

873

874

Novelty-seeking, information-seeking and addiction

## SUPPLEMENTARY FIGURES

### Figure Captions

**Figure S1. *Reward Context.*** Probability to perform *reward-driven*, *information-driven* and *other* strategy under High (**left panel**) and Low (**right panel**) Reward Context in both problem gambling and healthy group. Each group reduced information-driven choices and increased reward-driven choices in Low Reward Context compared to High Reward Context. And, compared to controls, problem gamblers (PG) frequently engaged in reward-driven decisions at the expense of information-driven in both reward contexts. Error bars are represented as s.e.m.

**Figure S2. *Familiarity vs. Ignorance.*** Participant's tendency to choose Most-Sampled and Least-Sampled alternatives (**a,c**), Least-Sampled and Mid-Sampled alternatives (**b,d**) with the respect of a baseline (i.e., mean tendency to choose Least-Sampled and Most-Sampled options or Least-Sampled and Mid-Sampled across all subjects).

**Figure S3. *gkRL's estimated parameters.*** Model fit on all free-choices revealed a decrease in information integration  $\omega$  (**a**), learning rate  $\alpha$  (**b**) and an increase in the information magnitude  $\gamma$  (**c**) in problem gamblers compared to controls. The softmax parameter  $\beta$  did not differ between the two groups (**d**).

## Figure

Figure S1

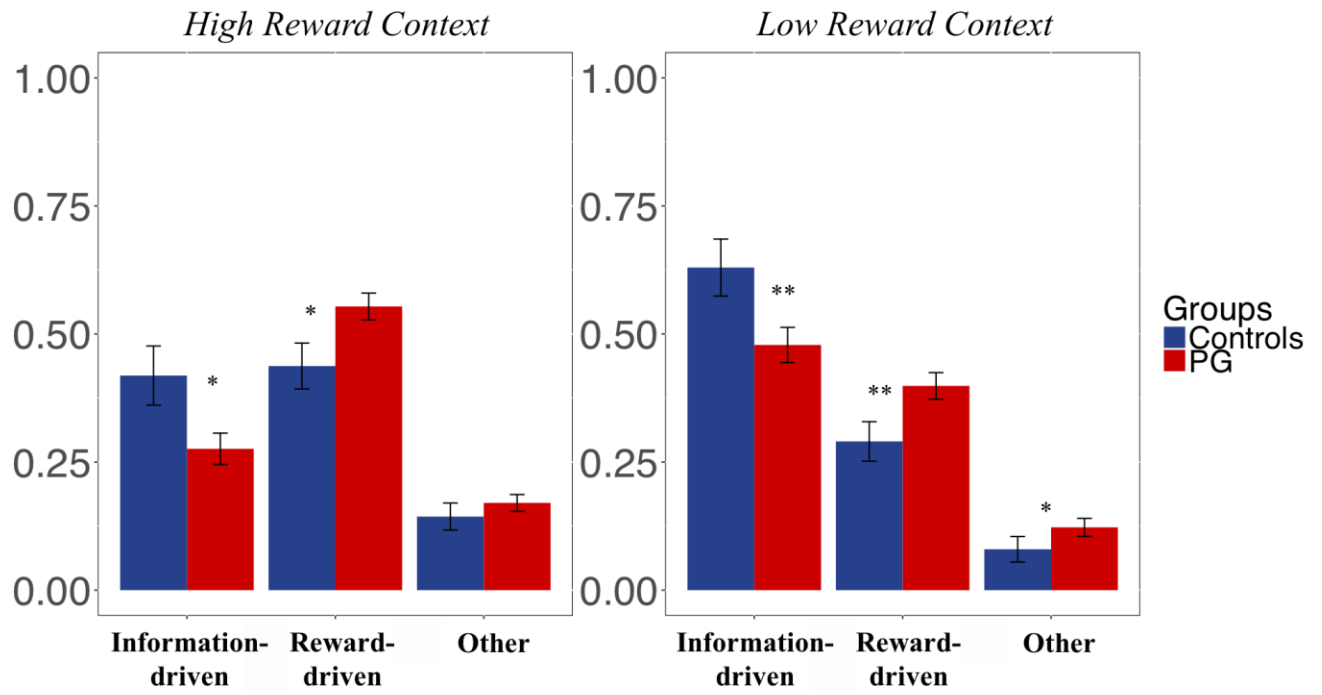

Figure S2

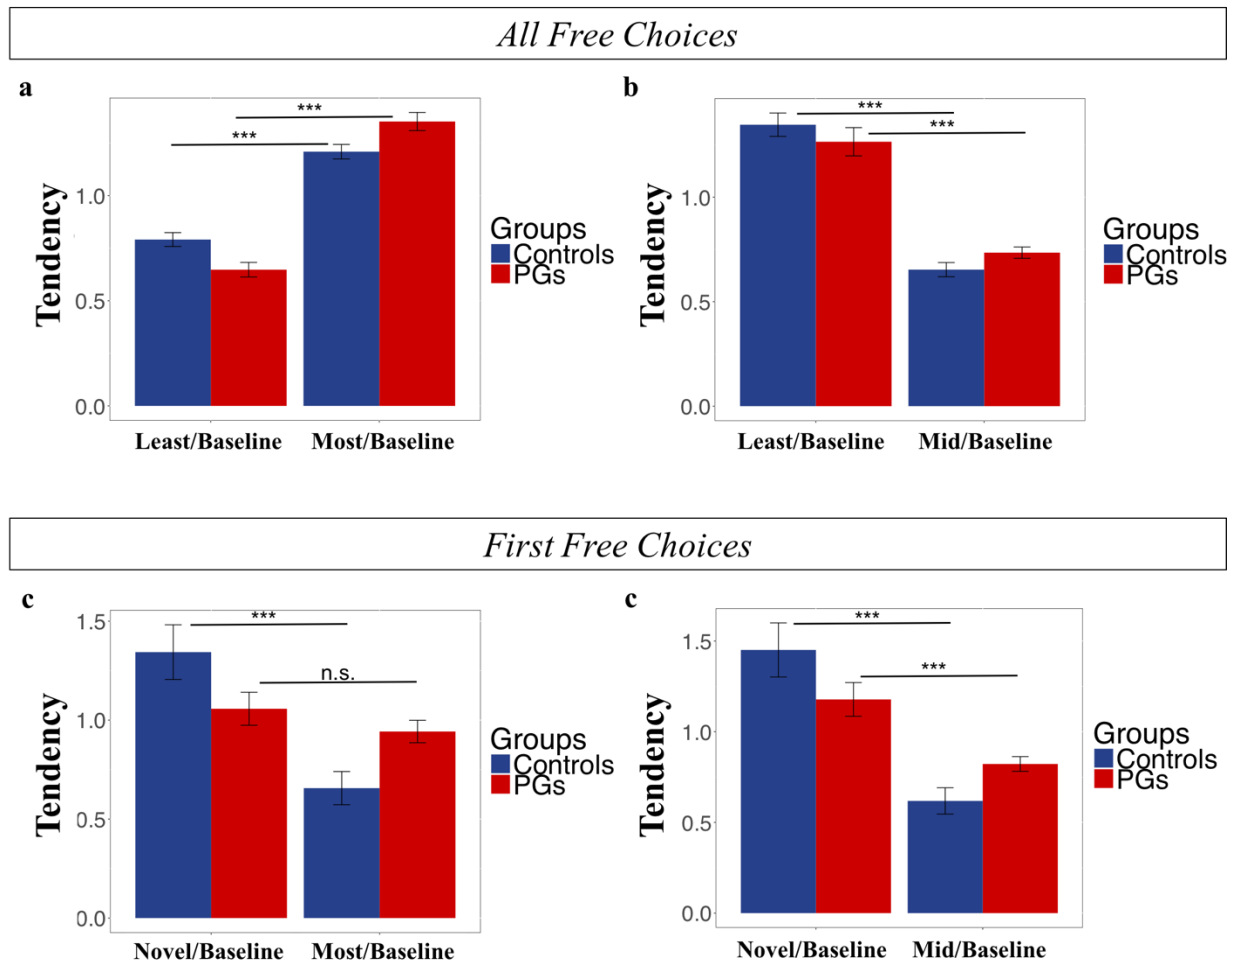

Figure S3

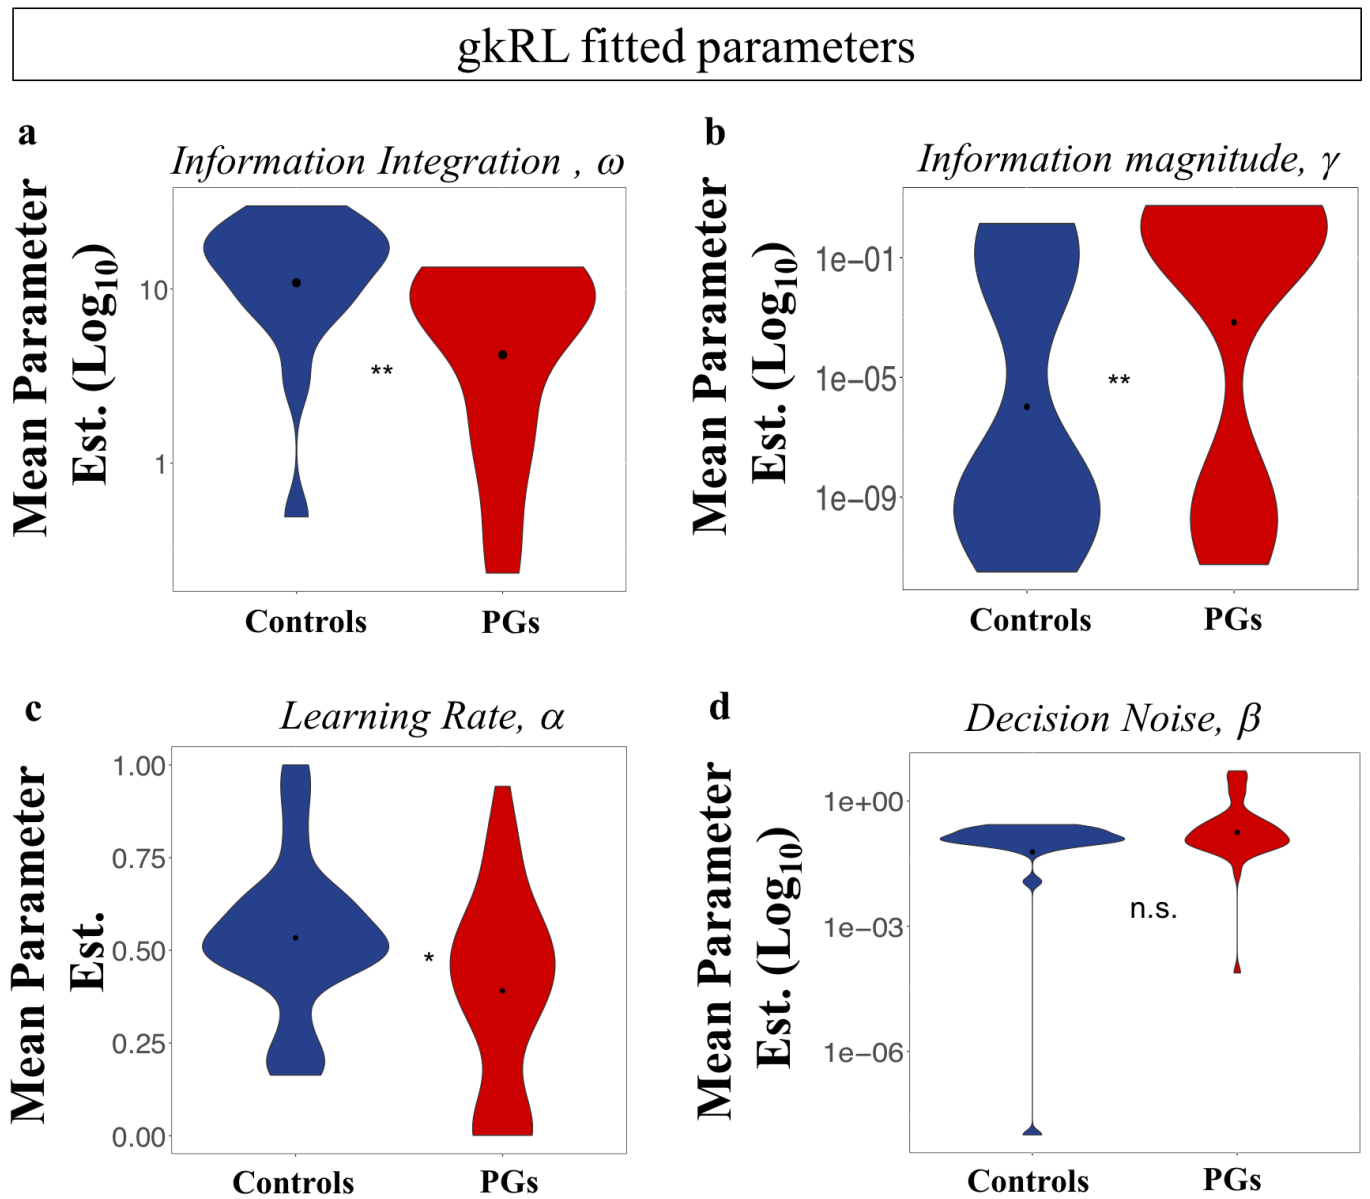

## **SUPPLEMENTARY TABLEs**

### **Table Captions**

**Table S1** *gkRL individual fitted parameters in PGs*

**Table S2** *gkRL individual fitted parameters in Controls*

**Table S3** *nkRL individual fitted parameters in PGs*

**Table S4** *nkRL individual fitted parameters in Controls*

## Table

Table S1

| PGs       | $\alpha$ | $\beta$ | $\omega$ | $\gamma$ |
|-----------|----------|---------|----------|----------|
| Subject01 | 0.545    | 0.055   | -0.6     | 1.528    |
| Subject02 | 0.53     | 0.098   | -0.005   | 4.187    |
| Subject03 | 0.491    | 0.07    | -7.753   | 0.546    |
| Subject04 | 0.942    | 0.019   | 1.201    | 1.79     |
| Subject05 | 0.396    | 0.095   | 8.124    | 0.202    |
| Subject06 | 0.257    | 0.356   | -13.703  | 0.387    |
| Subject07 | 0.438    | 0.378   | 8.559    | 5.66E-10 |
| Subject08 | 0.565    | 0.11    | 6.752    | 1.63E-11 |
| Subject09 | 0.014    | 1.687   | 1.64     | 0.038    |
| Subject10 | 0.285    | 0.17    | 10.901   | 1.39E-10 |
| Subject11 | 0.471    | 0.22    | -0.205   | 2.015    |
| Subject12 | 0.601    | 0.095   | -6.066   | 0.283    |
| Subject13 | 0.529    | 0.075   | -0.07    | 3.251    |
| Subject14 | 0.362    | 0.186   | 11.213   | 7.52E-10 |
| Subject15 | 0.007    | 5.283   | 0.234    | 4.73E-10 |
| Subject16 | 0.007    | 2.14    | -0.242   | 0.535    |
| Subject17 | 0.588    | 0.098   | 9.784    | 2.18E-09 |
| Subject18 | 0.007    | 1.156   | 0.404    | 0.132    |
| Subject19 | 0.017    | 0.103   | -0.212   | 1.971    |
| Subject20 | 0.555    | 0.197   | 8.278    | 7.24E-10 |
| Subject21 | 0.077    | 0.307   | 4.265    | 2.18E-11 |
| Subject22 | 0.363    | 0.09    | -0.024   | 3.52     |
| Subject23 | 0.018    | 0.531   | 1.605    | 8.47E-11 |
| Subject24 | 0.741    | 0.062   | -23.731  | 5.62E-12 |
| Subject25 | 0.405    | 0.166   | -0.085   | 2.767    |
| Subject26 | 0.512    | 0.202   | 13.36    | 1.52E-10 |
| Subject27 | 0.001    | 0.0001  | -601.036 | 2.247    |
| Subject28 | 0.398    | 0.252   | -12.281  | 0.63     |
| Subject29 | 0.49     | 0.13    | -1.424   | 1.087    |
| Subject30 | 0.751    | 0.104   | 10.206   | 1.57E-10 |
| Subject31 | 0.33     | 0.175   | -0.288   | 1.916    |
| Subject32 | 0.007    | 3.948   | -0.038   | 1.231    |
| Subject33 | 0.451    | 0.243   | 0.0001   | 5.459    |
| Subject34 | 0.001    | 4.096   | 0.0001   | 3.602    |
| Subject35 | 0.359    | 0.426   | -0.209   | 1.571    |
| Subject36 | 0.472    | 0.126   | -0.789   | 1.561    |
| Subject37 | 0.818    | 0.045   | -7.032   | 0.215    |
| Subject38 | 0.691    | 0.114   | -0.152   | 1.719    |
| Subject39 | 0.813    | 0.087   | -0.921   | 1.482    |
| Subject40 | 0.336    | 0.264   | 11.056   | 4.25E-10 |

**Table S2**

| <b>Controls</b> | $\alpha$ | $\beta$  | $\omega$ | $\gamma$ |
|-----------------|----------|----------|----------|----------|
| Subject01       | 0.791    | 0.135    | 21.873   | 2.32E-10 |
| Subject02       | 0.485    | 0.174    | 8.479    | 0.053    |
| Subject03       | 0.517    | 0.192    | 29.985   | 3.75E-10 |
| Subject04       | 0.527    | 0.12     | 13.341   | 0.164    |
| Subject05       | 0.644    | 0.103    | -7.579   | 4.30E-09 |
| Subject06       | 0.546    | 0.096    | -2.605   | 1.013    |
| Subject07       | 0.211    | 0.211    | 14.686   | 0.009    |
| Subject08       | 0.609    | 0.11     | -10.394  | 0.279    |
| Subject09       | 0.204    | 0.235    | 2.889    | 1.49E-09 |
| Subject10       | 0.163    | 0.272    | 8.177    | 4.21E-12 |
| Subject11       | 0.466    | 0.139    | 11.404   | 3.17E-12 |
| Subject12       | 0.468    | 0.094    | 15.366   | 9.65E-10 |
| Subject13       | 0.58     | 0.012    | -152.108 | 3.07E-10 |
| Subject14       | 0.657    | 0.122    | 19.181   | 0.086    |
| Subject15       | 0.561    | 0.268    | 5.456    | 1.51E-09 |
| Subject16       | 0.653    | 0.129    | 22.011   | 0.182    |
| Subject17       | 0.908    | 0.062    | -9.774   | 7.10E-10 |
| Subject18       | 1        | 0.083    | 19.082   | 7.24E-10 |
| Subject19       | 0.473    | 0.123    | 29.375   | 0.039    |
| Subject20       | 0.317    | 0.202    | 8.53     | 1.80E-10 |
| Subject21       | 0.486    | 0.185    | 16.532   | 3.87E-10 |
| Subject22       | 0.474    | 1.00E-08 | 0.491    | 1.375    |



**Table S3**

| PGs       | $\alpha$ | $\beta$ | $\kappa$ | $\nu$   |
|-----------|----------|---------|----------|---------|
| Subject01 | 0.471    | 0.06    | 0.464    | -3.412  |
| Subject02 | 0.327    | 0.137   | -0.216   | 1.768   |
| Subject03 | 0.32     | 0.093   | -0.023   | -11.466 |
| Subject04 | 0.953    | 0.019   | 9.721    | 36.714  |
| Subject05 | 0.411    | 0.092   | 1.09     | 14.321  |
| Subject06 | 0.23     | 0.339   | -0.525   | -24.123 |
| Subject07 | 0.429    | 0.397   | -0.772   | 5.453   |
| Subject08 | 0.567    | 0.109   | -0.46    | 5.053   |
| Subject09 | 0.015    | 1.576   | -0.032   | 1.669   |
| Subject10 | 0.341    | 0.153   | -2.008   | 4.61    |
| Subject11 | 0.374    | 0.259   | -0.351   | -3.353  |
| Subject12 | 0.578    | 0.099   | 0.082    | -8.211  |
| Subject13 | 0.057    | 0.447   | -0.251   | 0.93    |
| Subject14 | 0.363    | 0.184   | -0.511   | 9.34    |
| Subject15 | 0.259    | 0.241   | -0.967   | 2.08    |
| Subject16 | 0.007    | 2.434   | -0.006   | -0.448  |
| Subject17 | 0.587    | 0.098   | 0.166    | 10.411  |
| Subject18 | 0.157    | 0.067   | -0.145   | 7.452   |
| Subject19 | 0.019    | 0.108   | -1.325   | -3.154  |
| Subject20 | 0.545    | 0.198   | -0.501   | 6.368   |
| Subject21 | 0.081    | 0.29    | -0.331   | 3.275   |
| Subject22 | 0.219    | 0.138   | -1.07    | 0.148   |
| Subject23 | 0.018    | 0.532   | -0.081   | 1.317   |
| Subject24 | 0.74     | 0.062   | -0.166   | -24.325 |
| Subject25 | 0.249    | 0.258   | -0.911   | 1.684   |
| Subject26 | 0.509    | 0.201   | -0.892   | 9.942   |
| Subject27 | 1.01E-08 | 0.019   | -10      | -75.45  |
| Subject28 | 0.258    | 0.244   | 0.532    | -21.555 |
| Subject29 | 0.38     | 0.152   | -0.752   | -6.141  |
| Subject30 | 0.76     | 0.103   | -0.595   | 7.975   |
| Subject31 | 0.215    | 0.253   | -0.639   | -4.756  |
| Subject32 | 0.007    | 4.317   | -0.027   | -0.207  |
| Subject33 | 0.39     | 0.27    | -0.262   | -0.992  |
| Subject34 | 0.001    | 4.207   | -0.026   | -0.135  |
| Subject35 | 0.313    | 0.491   | -0.373   | -0.416  |
| Subject36 | 0.278    | 0.175   | -0.84    | -5.974  |
| Subject37 | 0.831    | 0.047   | 2.615    | 0.848   |
| Subject38 | 0.666    | 0.119   | -0.183   | 0.508   |
| Subject39 | 0.729    | 0.096   | -0.74    | -9.481  |
| Subject40 | 0.323    | 0.267   | -0.859   | 7.627   |

**Table S4**

| <b>Controls</b> | $\alpha$ | $\beta$ | $\kappa$ | $\nu$    |
|-----------------|----------|---------|----------|----------|
| Subject01       | 0.792    | 0.135   | -0.092   | 21.556   |
| Subject02       | 0.49     | 0.172   | -0.107   | 8.647    |
| Subject03       | 0.554    | 0.182   | -0.967   | 27.239   |
| Subject04       | 0.566    | 0.115   | 1.206    | 21.26    |
| Subject05       | 0.652    | 0.103   | 0.534    | -5.61    |
| Subject06       | 0.395    | 0.117   | 0.105    | -6.518   |
| Subject07       | 0.214    | 0.209   | 0.068    | 15.278   |
| Subject08       | 0.542    | 0.119   | -0.204   | -14.775  |
| Subject09       | 0.209    | 0.227   | -0.61    | 0.751    |
| Subject10       | 0.172    | 0.26    | -0.27    | 7.534    |
| Subject11       | 0.485    | 0.133   | -1.299   | 6.819    |
| Subject12       | 0.473    | 0.094   | 0.461    | 17.079   |
| Subject13       | 0.585    | 0.012   | 11.524   | -105.482 |
| Subject14       | 0.666    | 0.121   | 0.897    | 24.784   |
| Subject15       | 0.561    | 0.267   | 0.055    | 5.67     |
| Subject16       | 0.69     | 0.124   | 1.622    | 33.115   |
| Subject17       | 0.911    | 0.062   | -0.68    | -12.356  |
| Subject18       | 1        | 0.083   | 0.235    | 19.923   |
| Subject19       | 0.473    | 0.123   | 0.513    | 32.645   |
| Subject20       | 0.306    | 0.206   | -0.759   | 5.464    |
| Subject21       | 0.485    | 0.181   | -1.683   | 10.729   |
| Subject22       | 1.00E-08 | 0.978   | 0.044    | -0.465   |
